# Supplementary material for: Global Cancer Incidence and Mortality Rates and Trends—An Update
Source: Oxford University Press journal article supplement (doi:10.1158/1055-9965.epi-15-0578), 2015-12-14
Supplement: 10559965epi150578-sup-149309_2_supp_3124771_nty9z3.docx [file 10559965epi150578-sup-149309_2_supp_3124771_nty9z3.docx]

**Supplementary Figure S1. All sites cancer incidence rates by sex in select registries, 2003–2007**

**
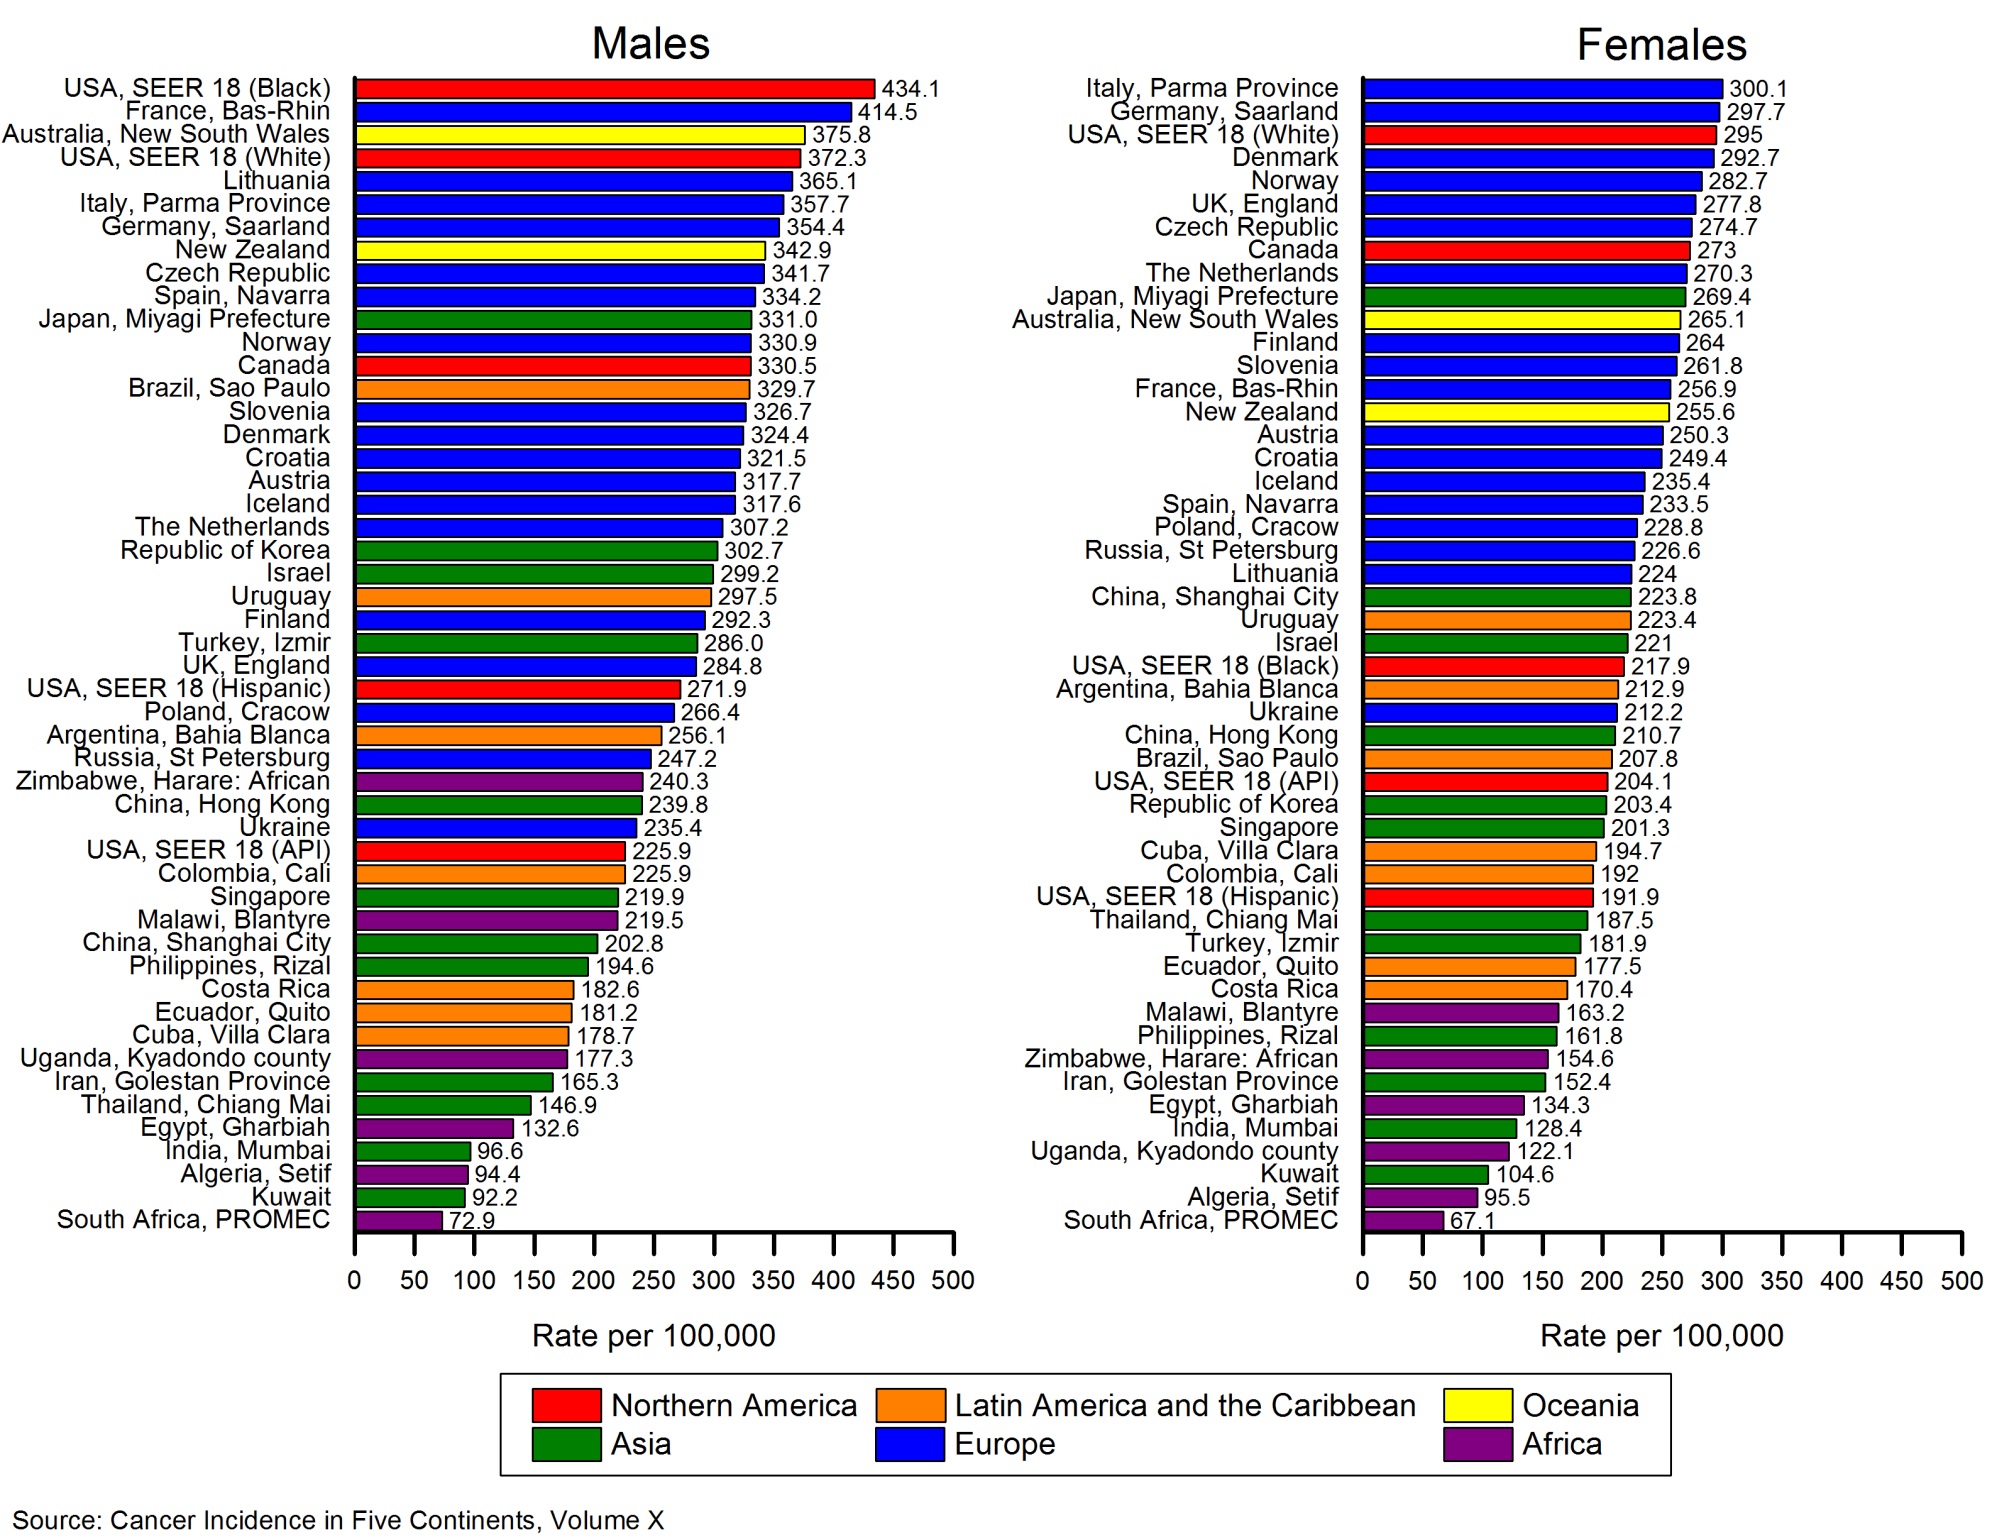
**

**Supplementary Figure S2. All sites cancer mortality rates by sex, select countries, 2003–2007**

**
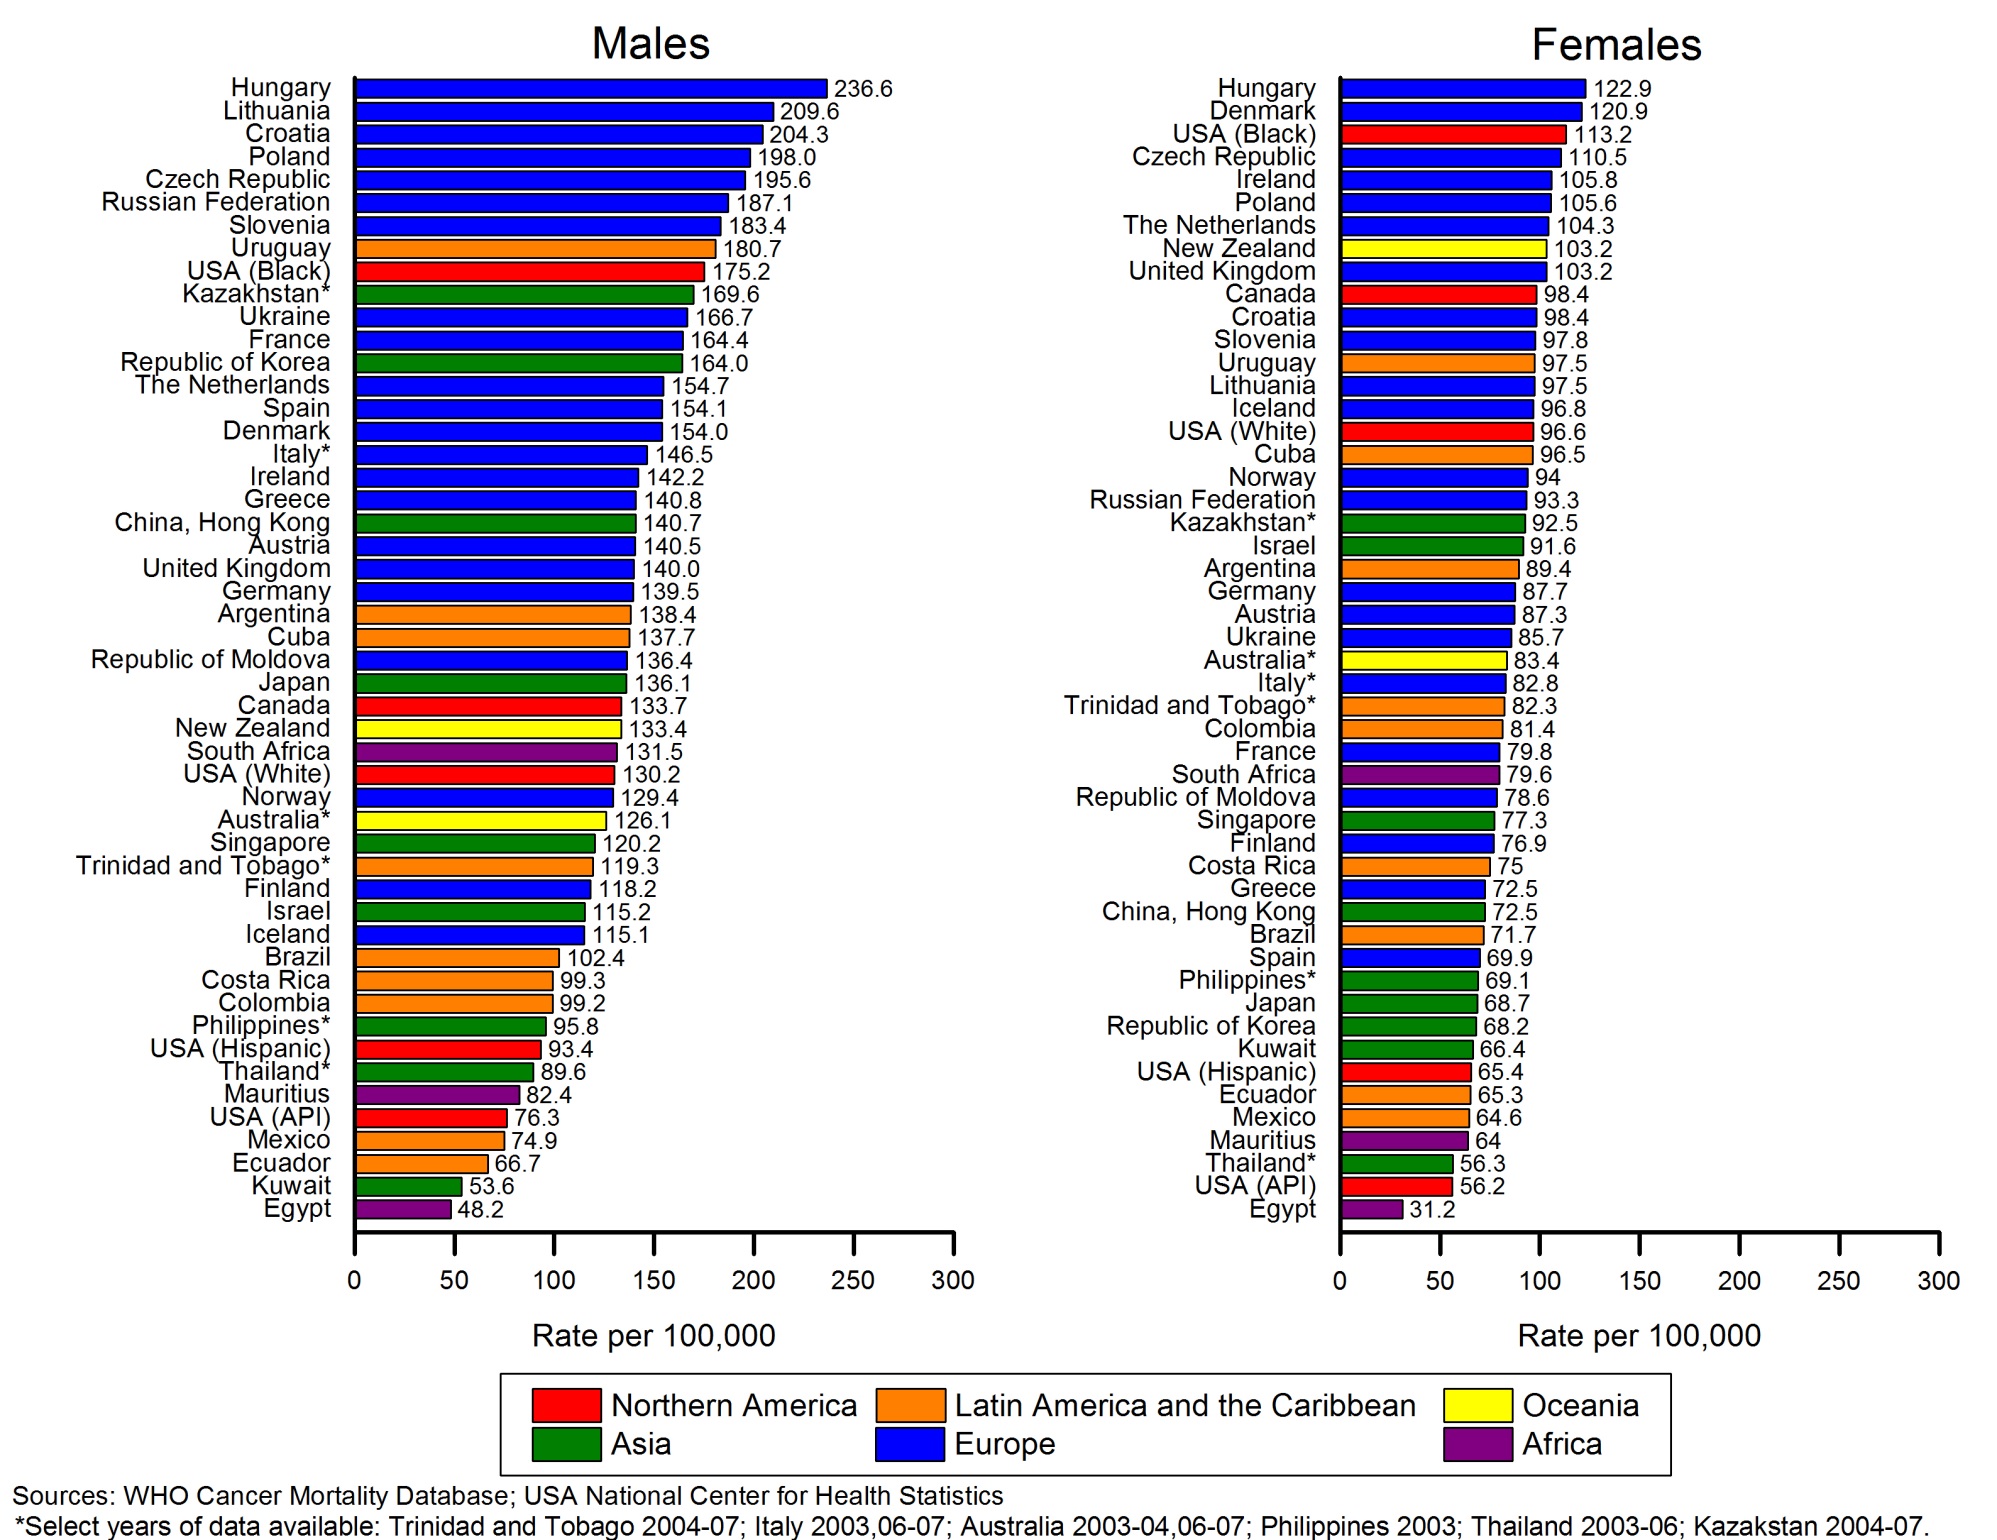
**

**Supplementary Figure S3. Lung cancer mortality rates by sex, select countries, 2003–2007**

**
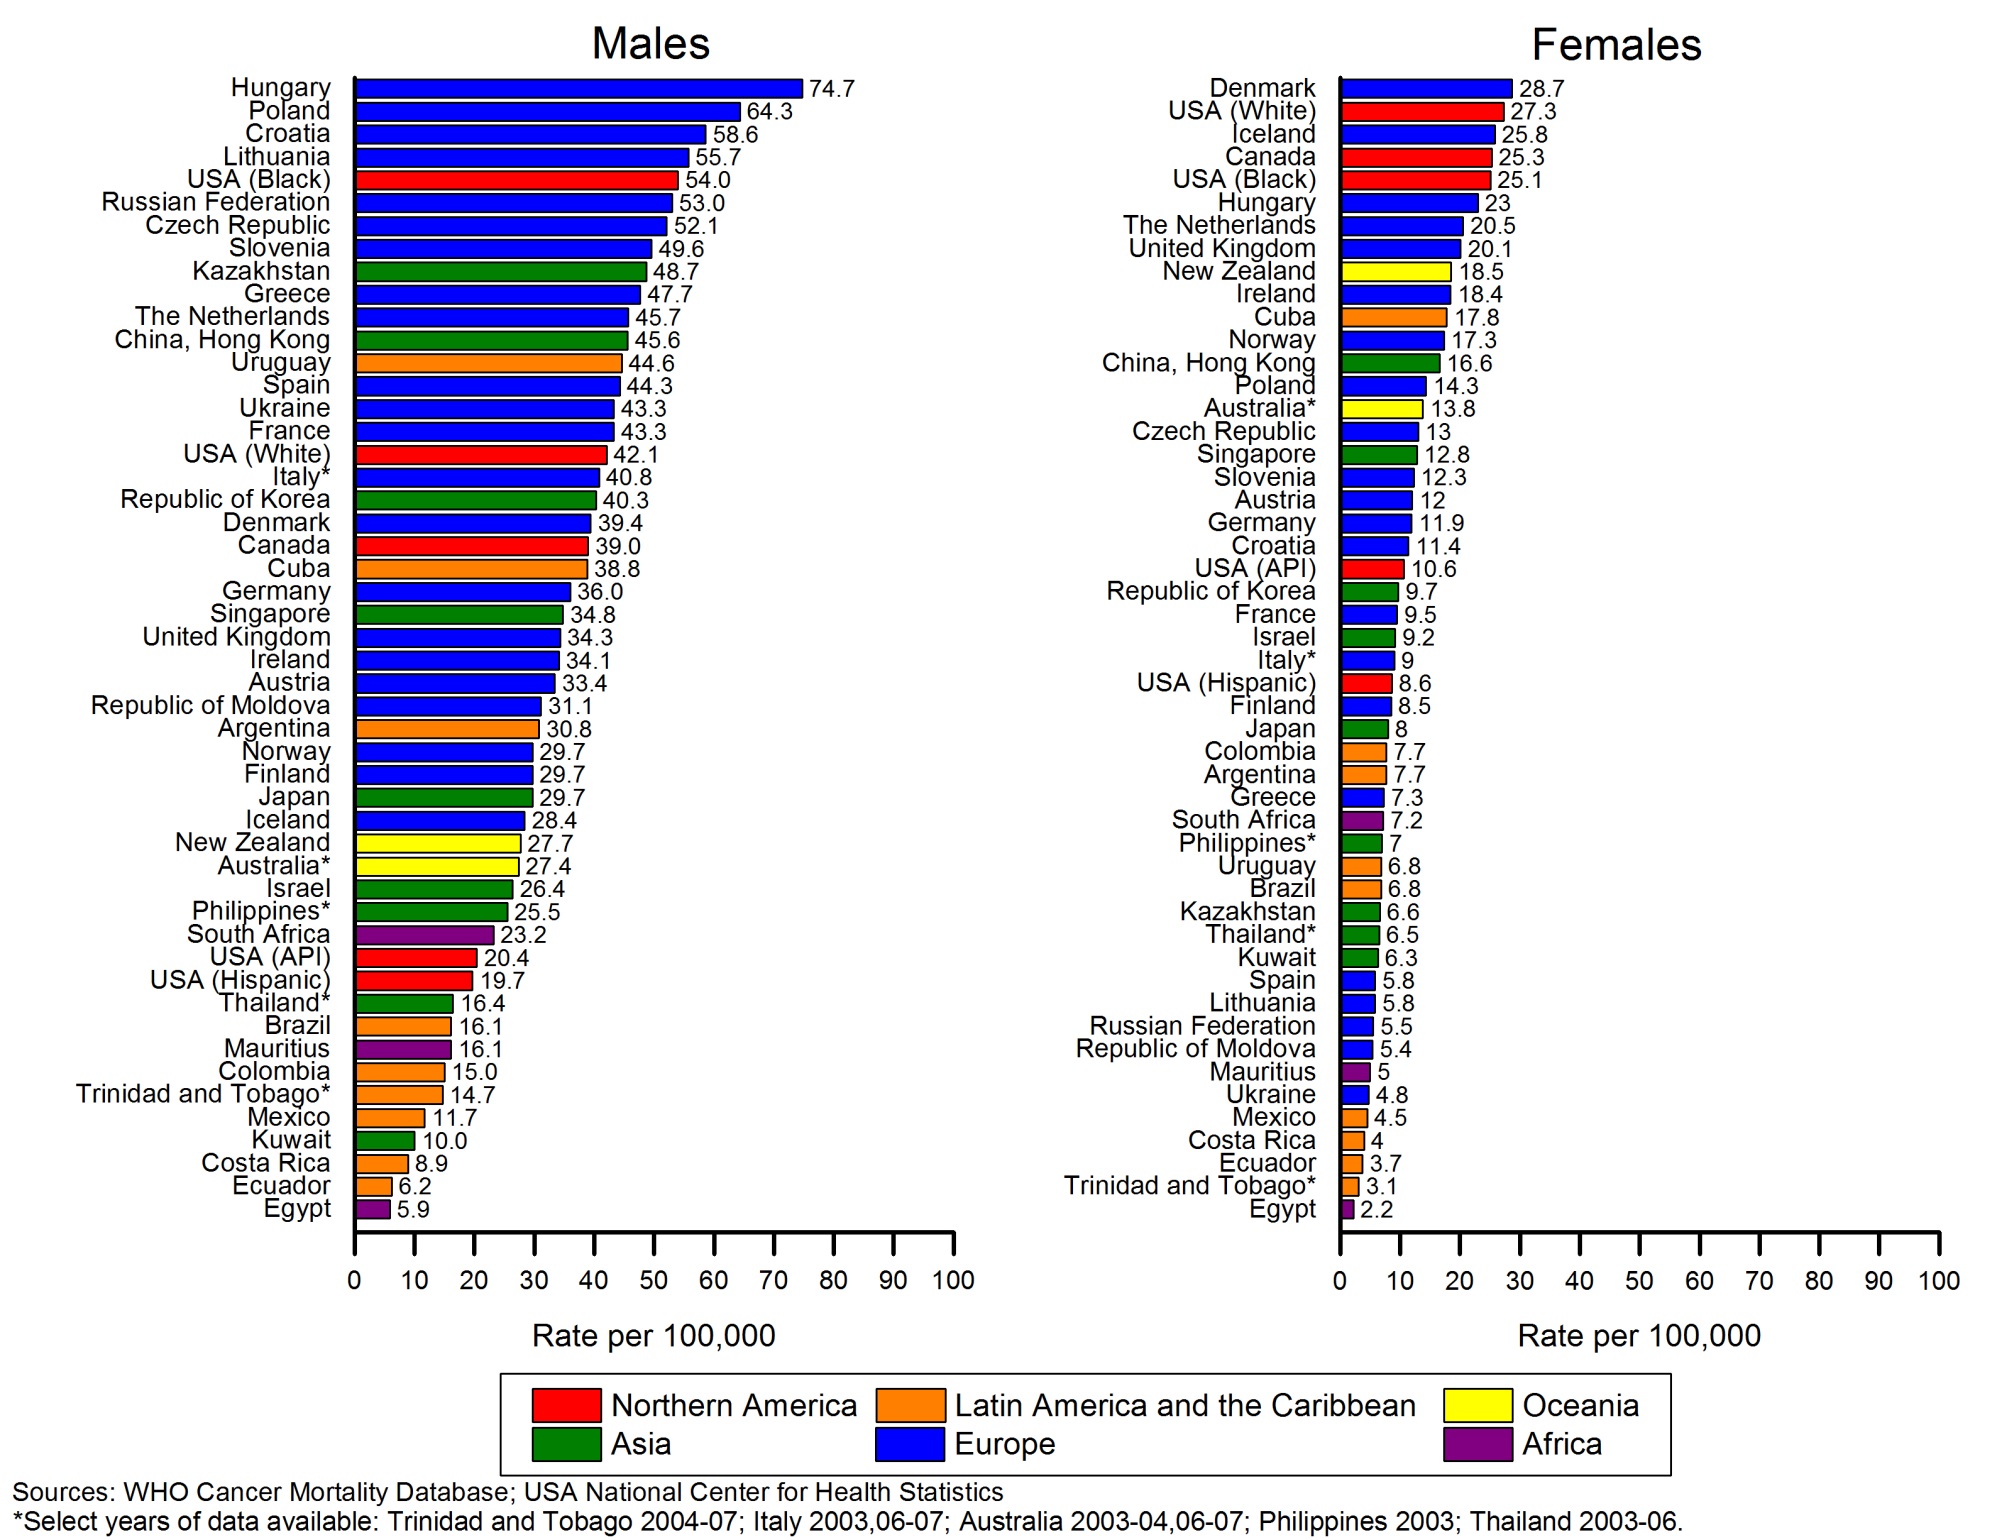
**

**Supplementary Figure S4. Lung cancer mortality trends by sex, select countries, 1950–2012
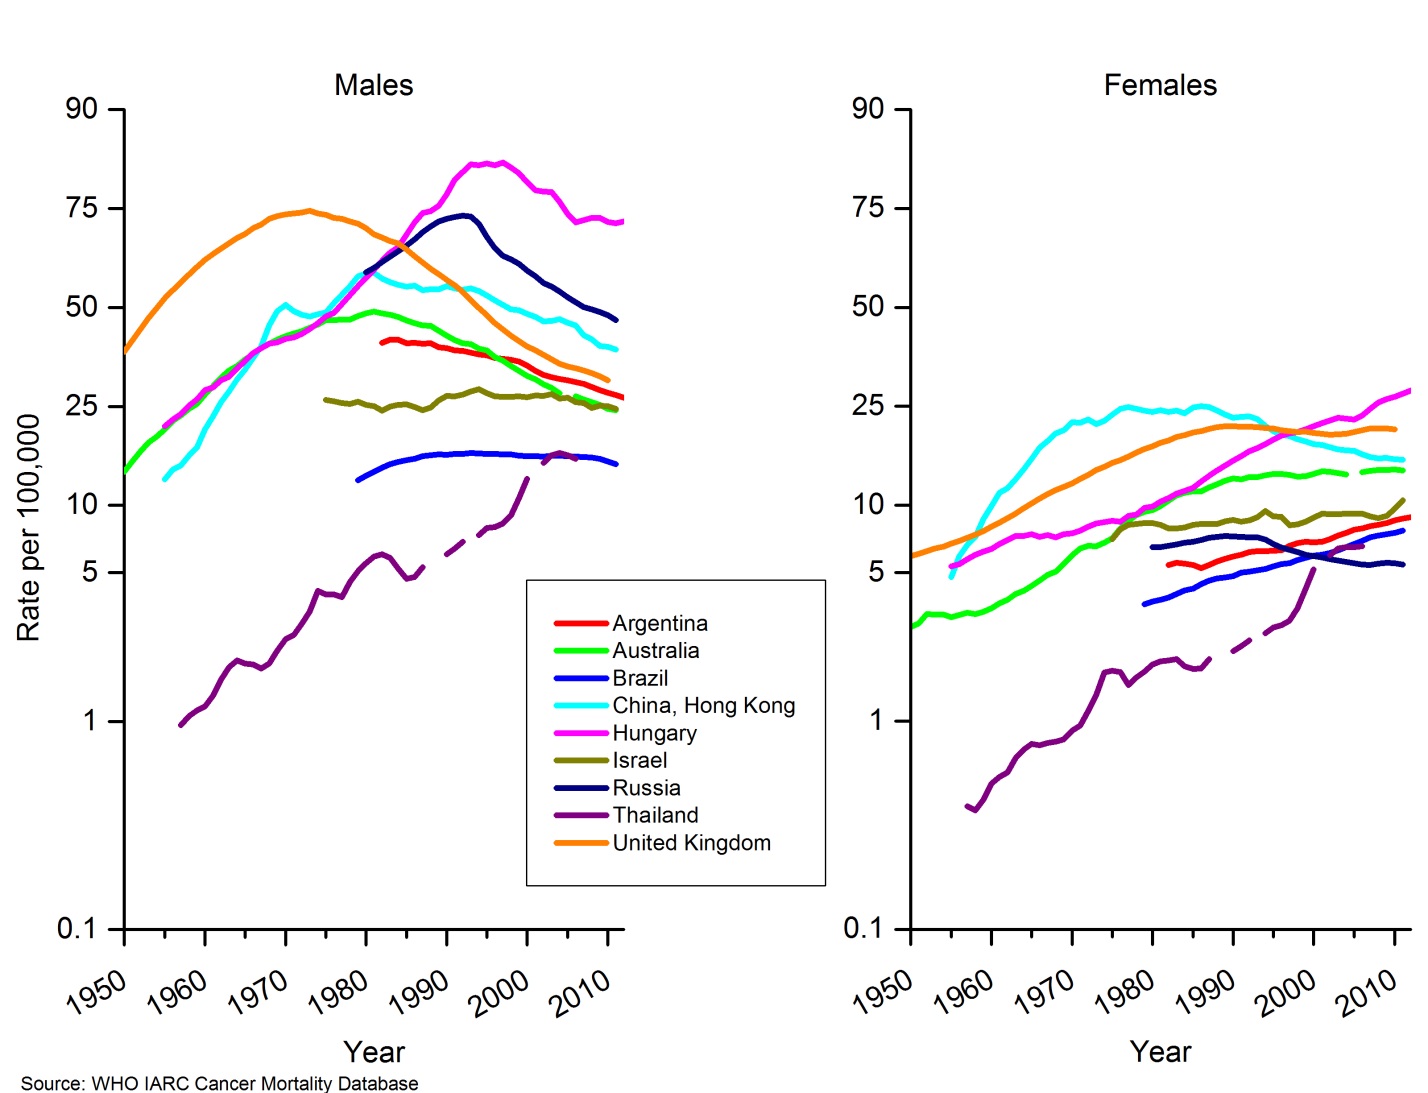
**

**Supplementary Figure S5. Colorectal cancer incidence rates by sex in select registries, 2003–2007**

**
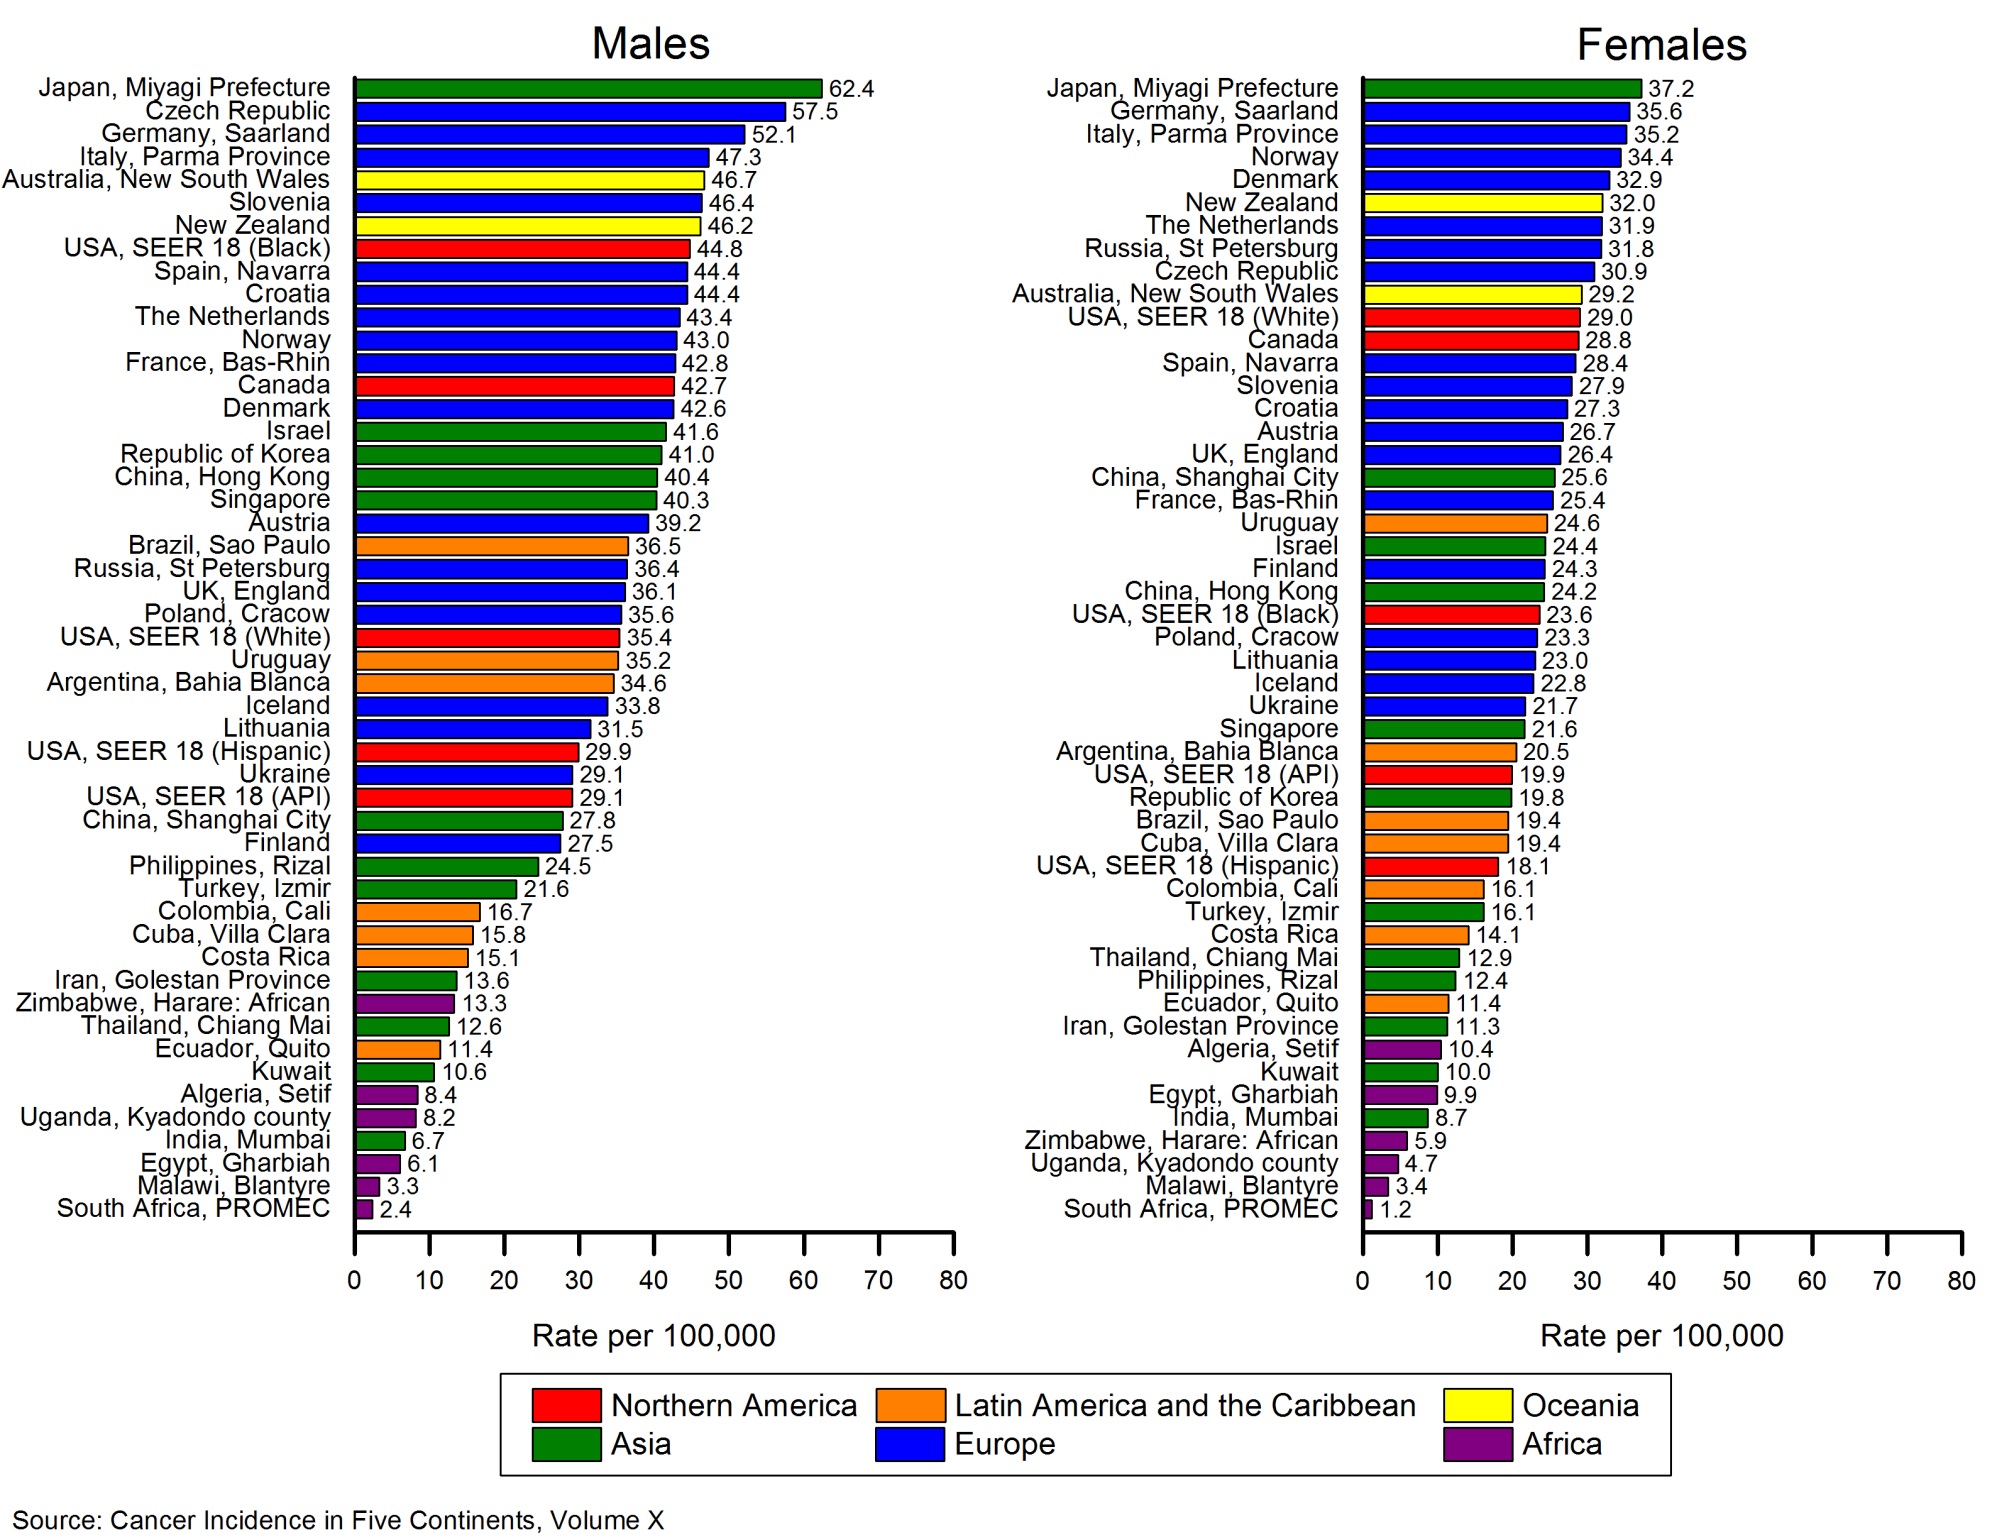
**

**Supplementary Figure S6. Colorectal cancer mortality rates by sex, select countries, 2003–2007**

**
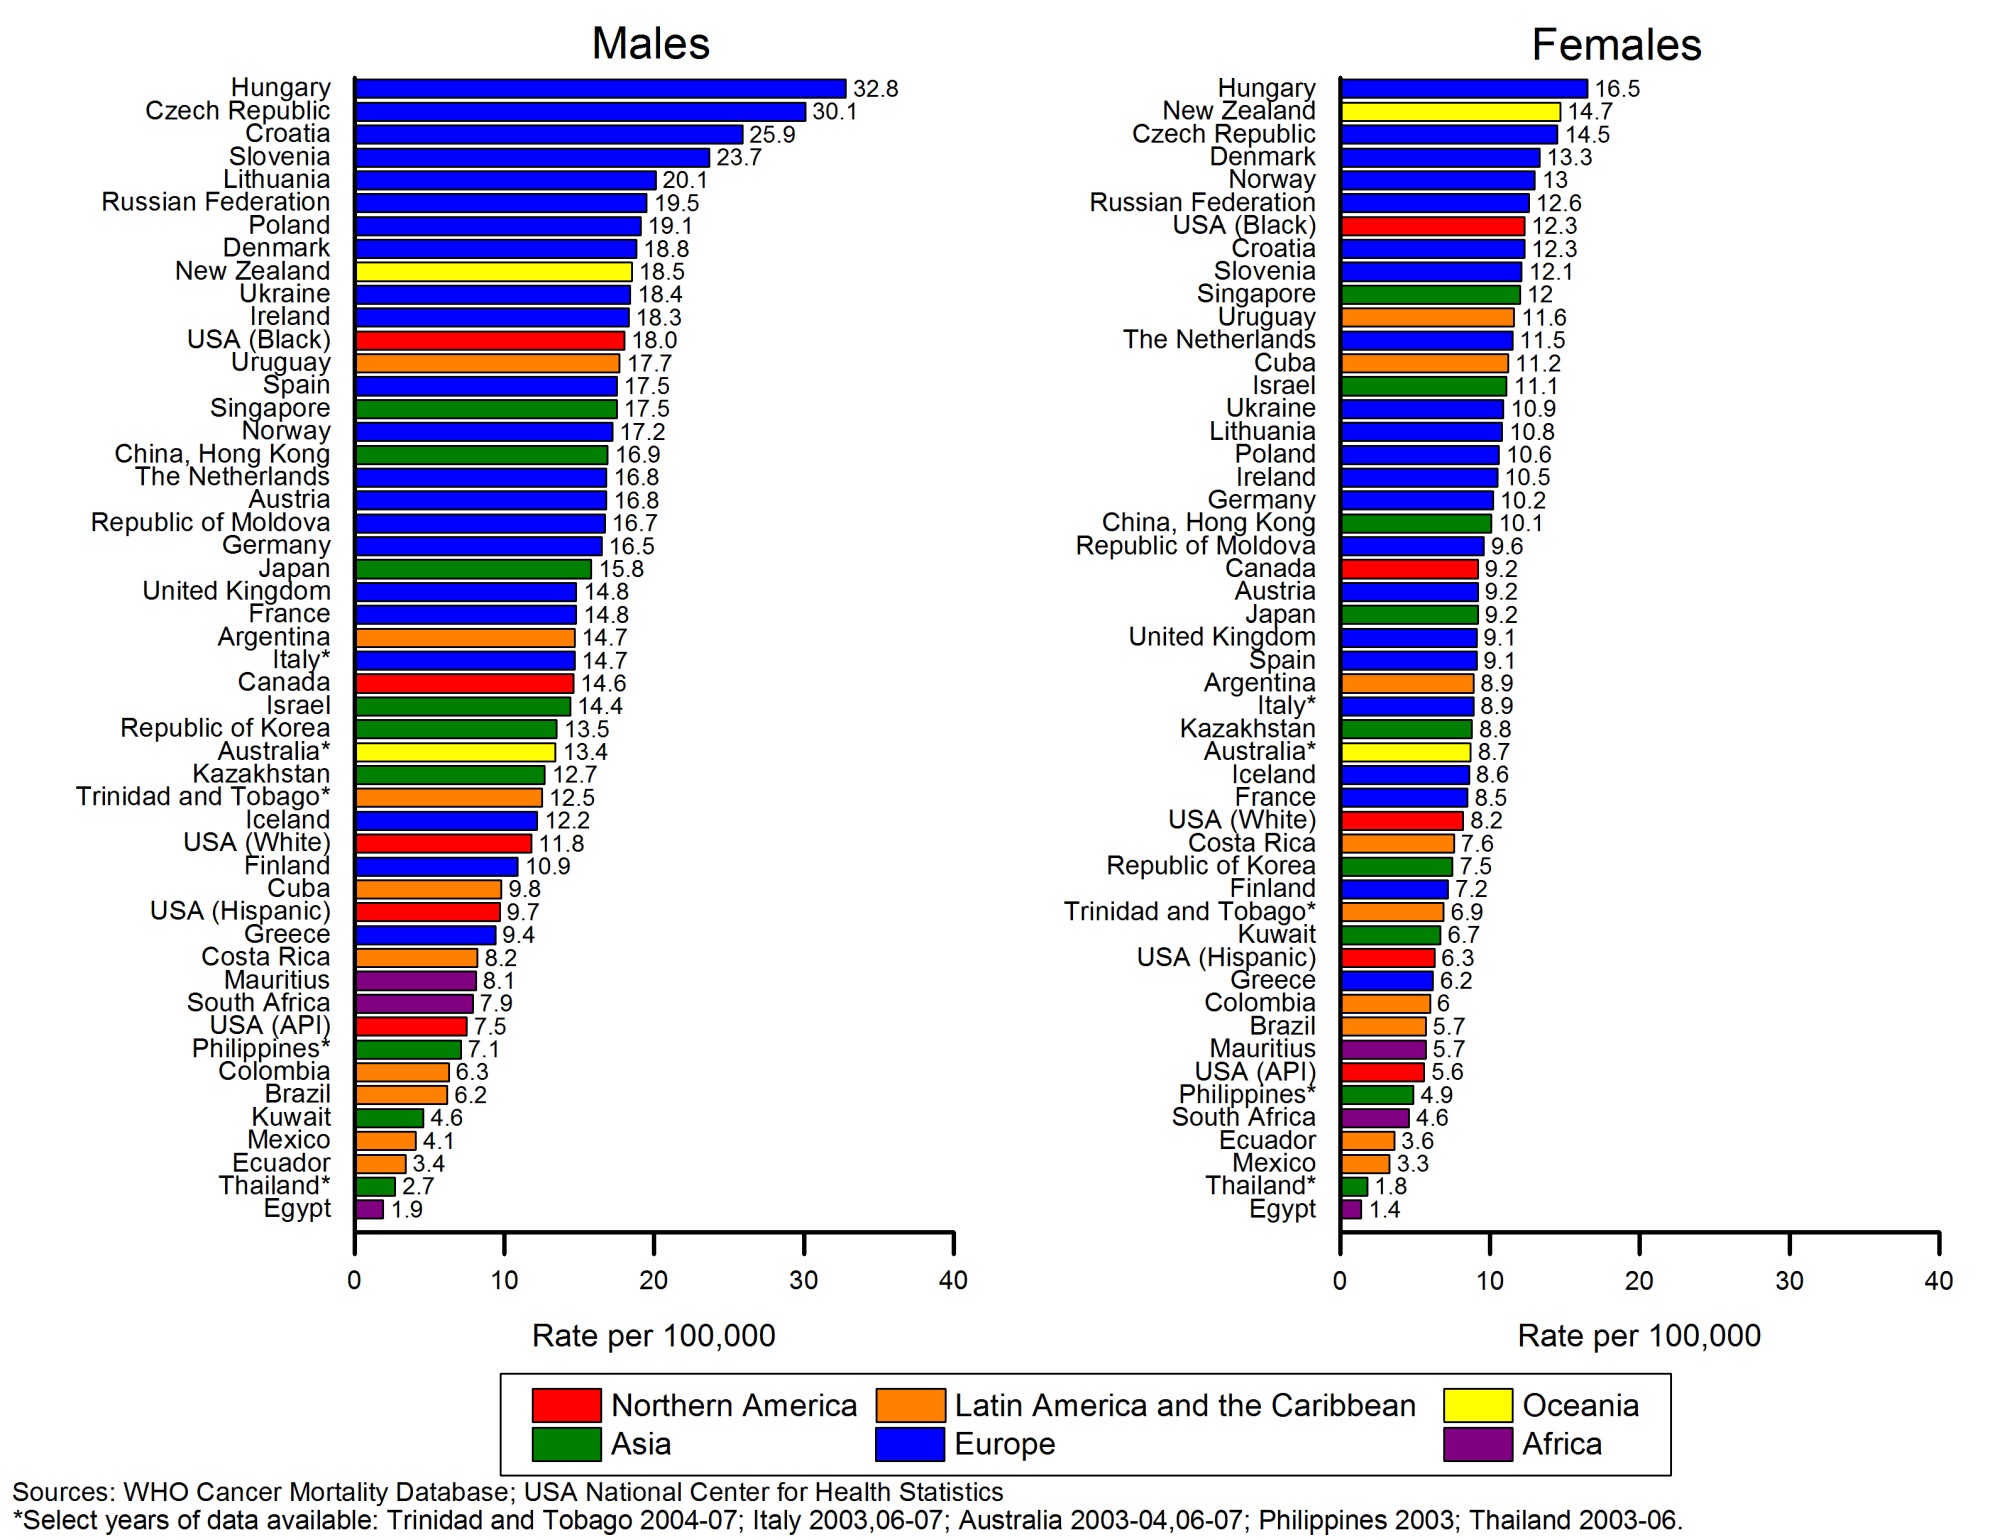
**

**Supplementary Figure S7. Female breast cancer incidence and mortality rates in select registries and countries, 2003­–2007**

**
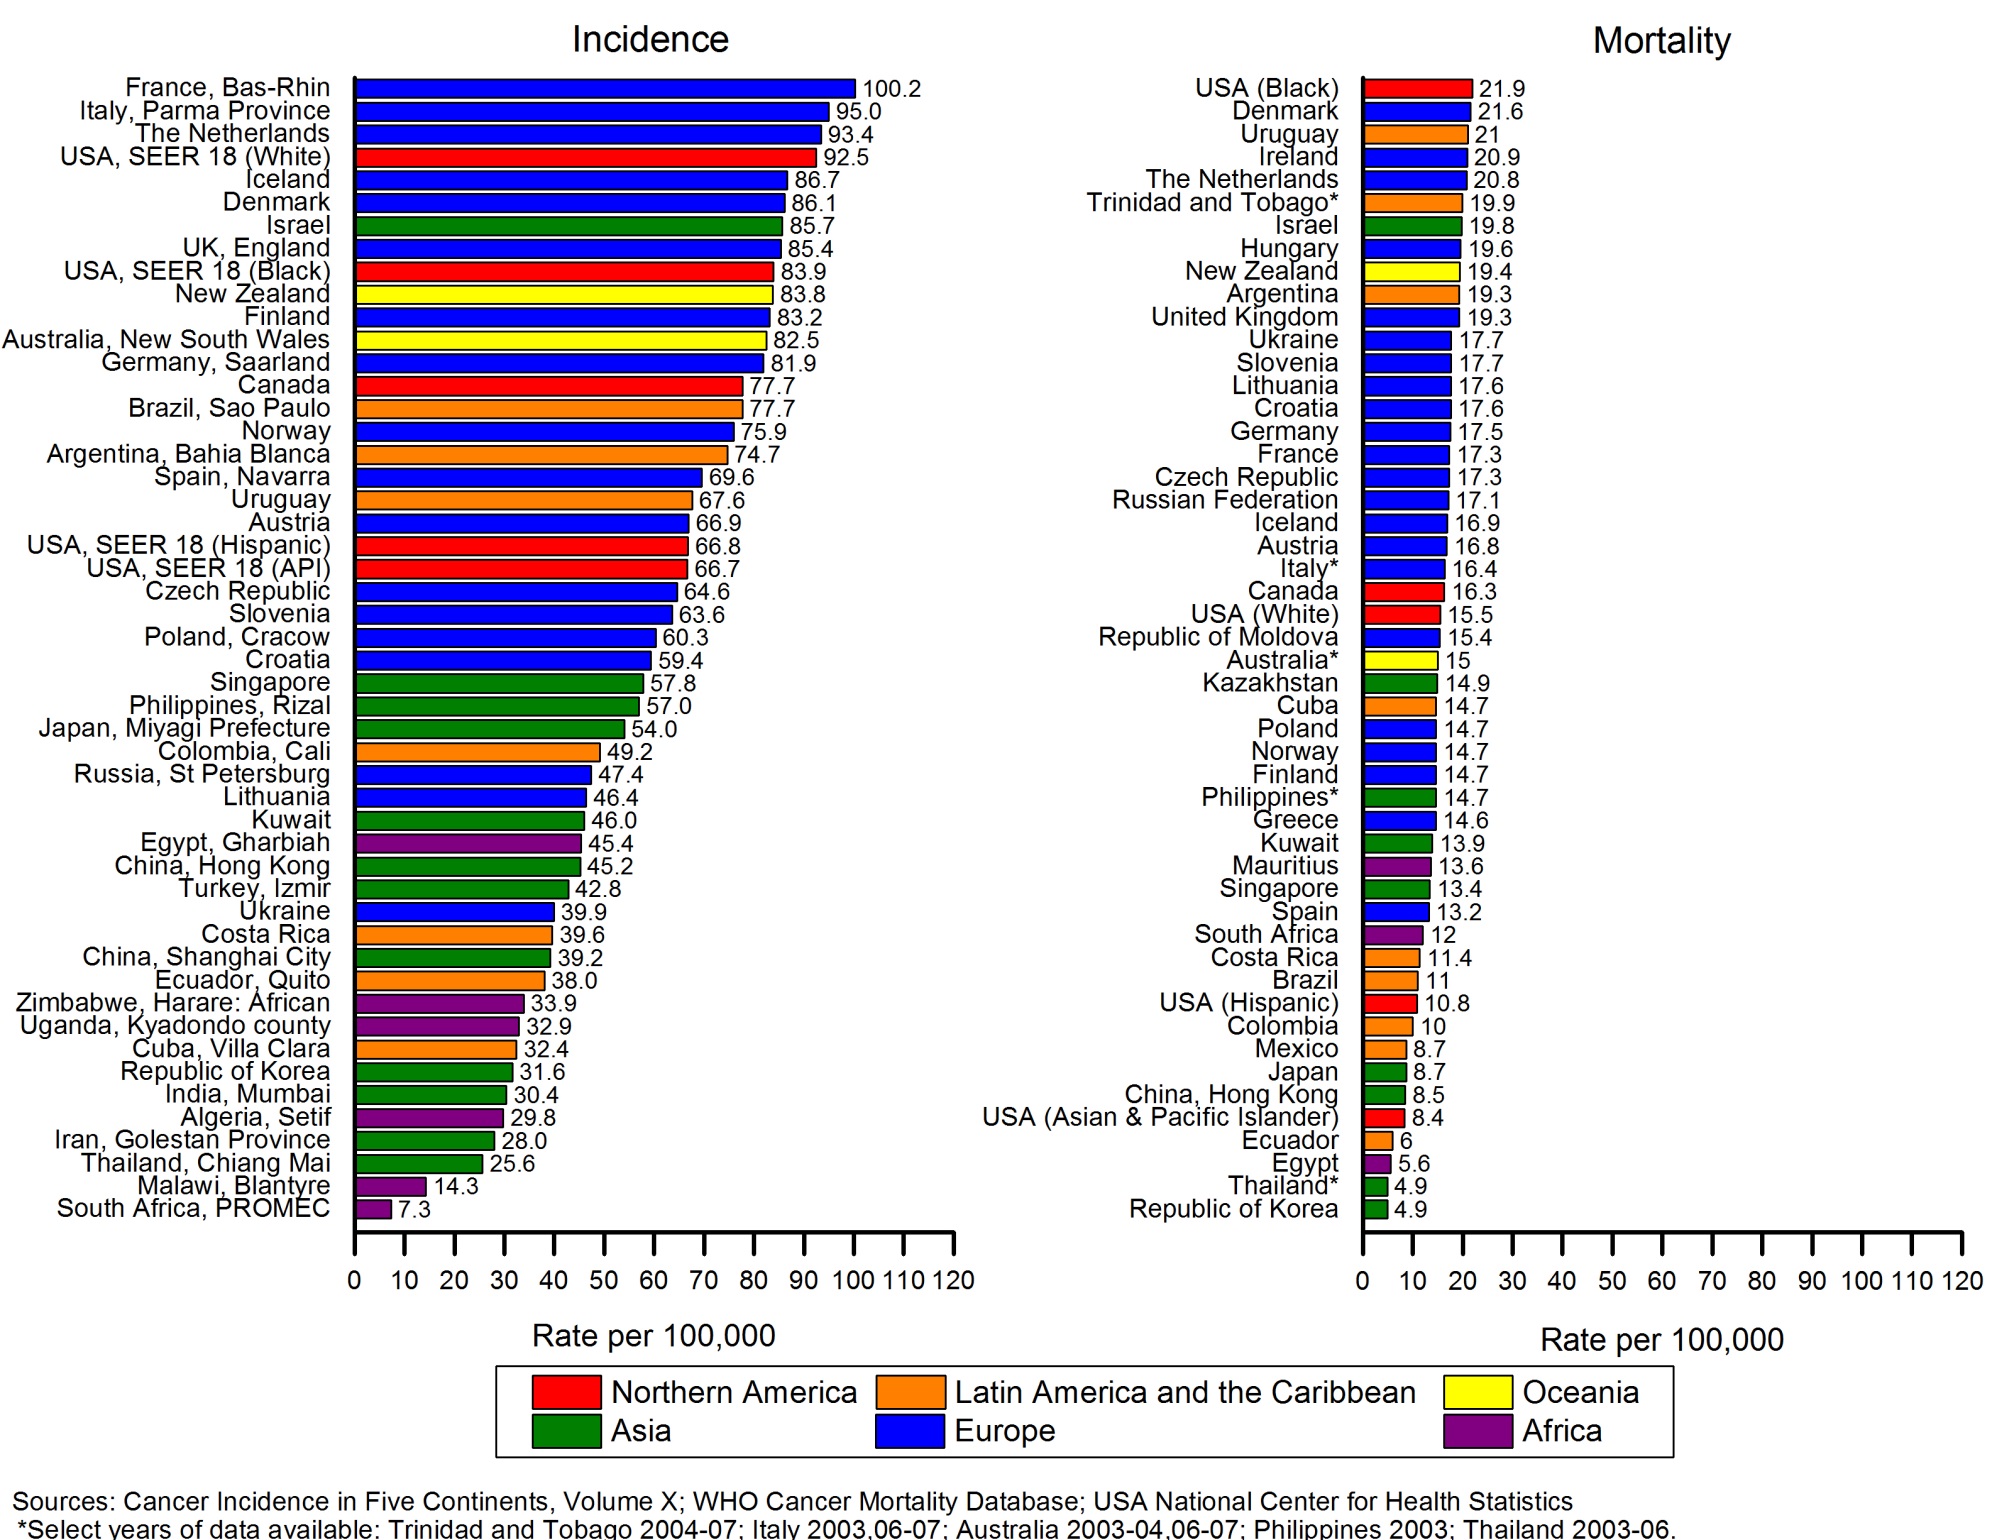
**

**Supplementary Figure S8. Female breast cancer mortality trends, select countries, 1950–2012**

**
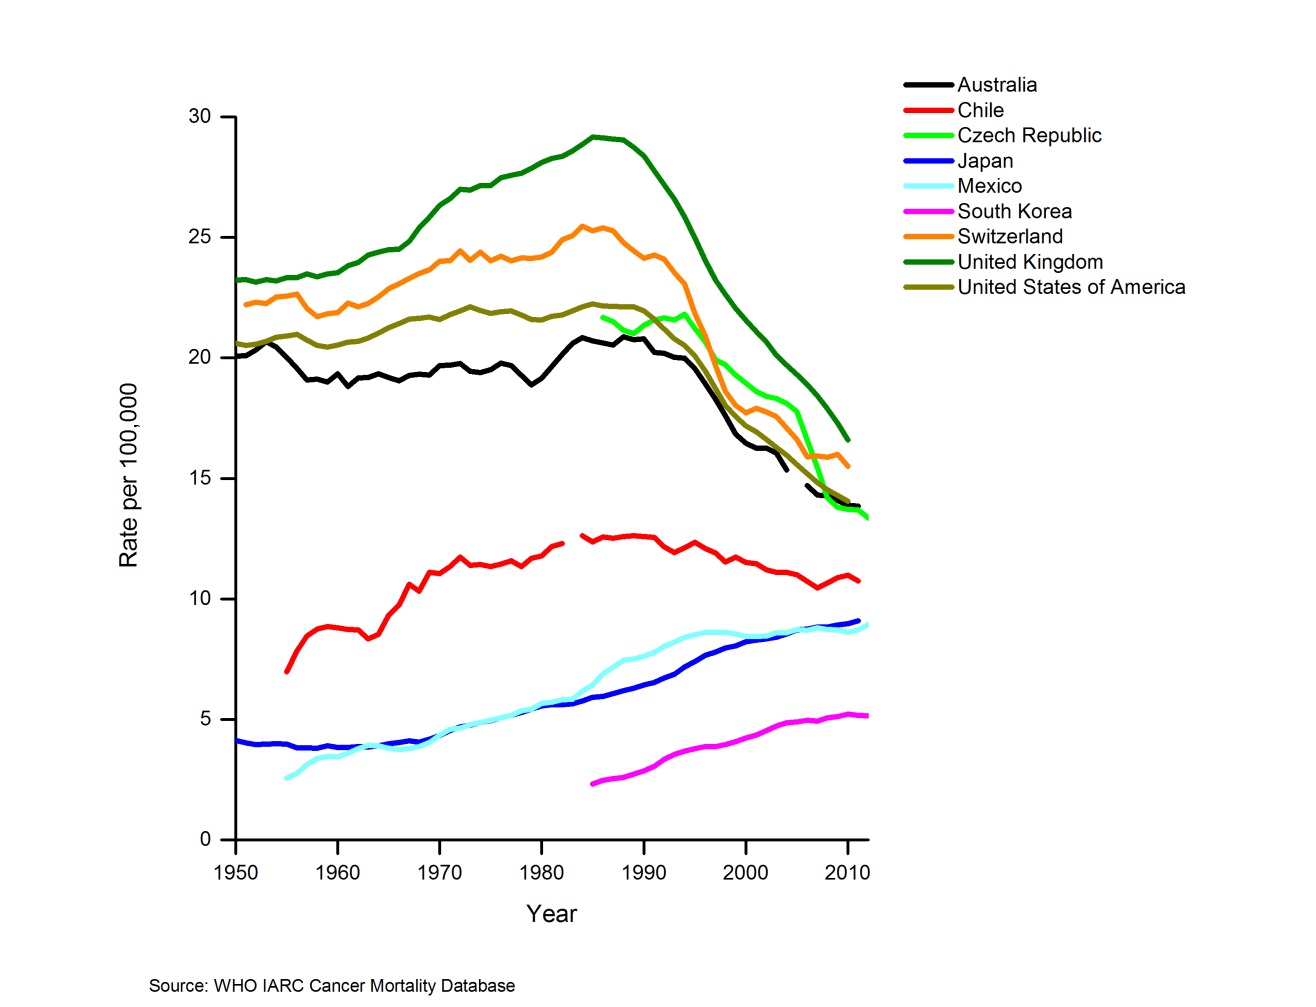
**

**Supplementary Figure S9. Prostate cancer incidence and mortality rates in select registries and countries, 2003–2007**

**
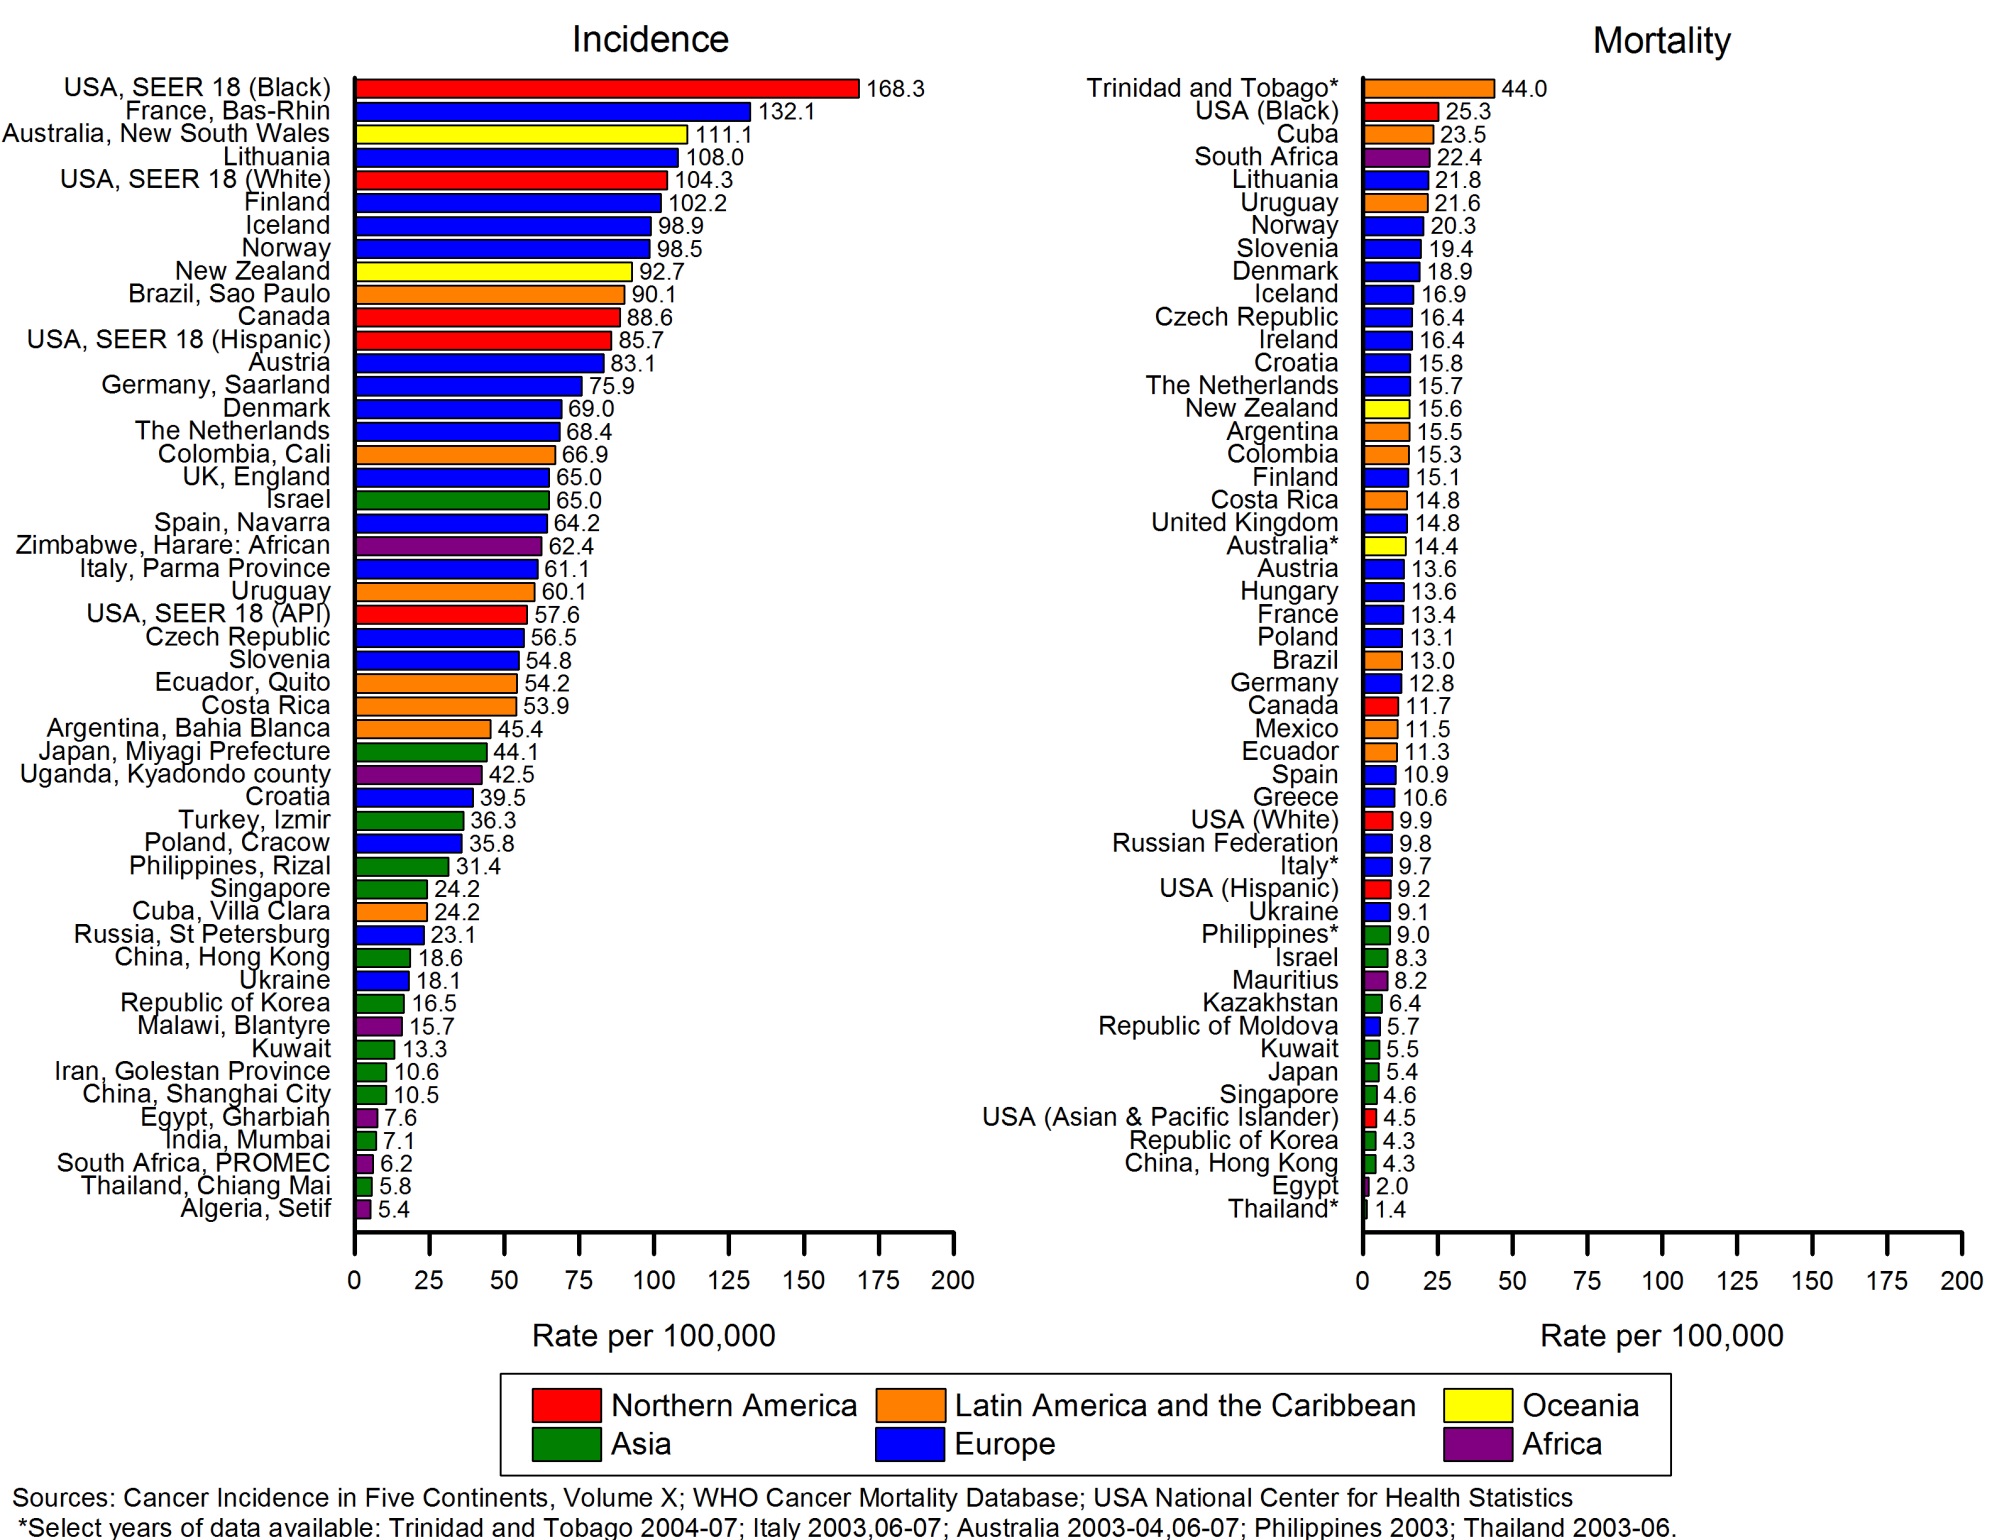
**

**Supplementary Figure S10. Prostate cancer mortality trends, select countries, 1950–2012**

**
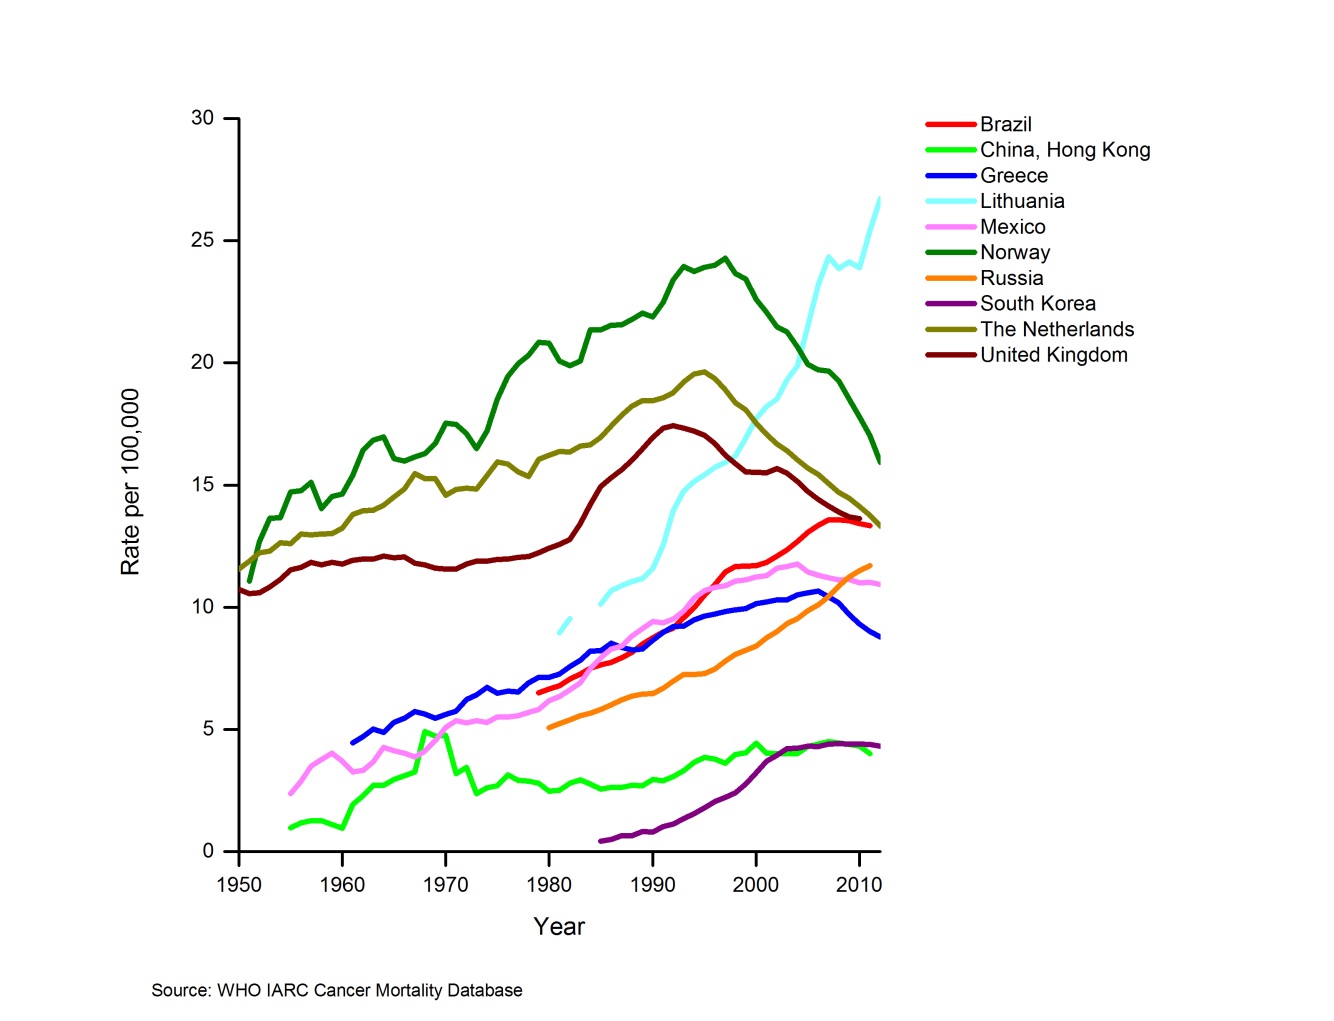
**

**Supplementary Figure S11. Stomach cancer mortality rates by sex, select countries, 2003–2007**

**
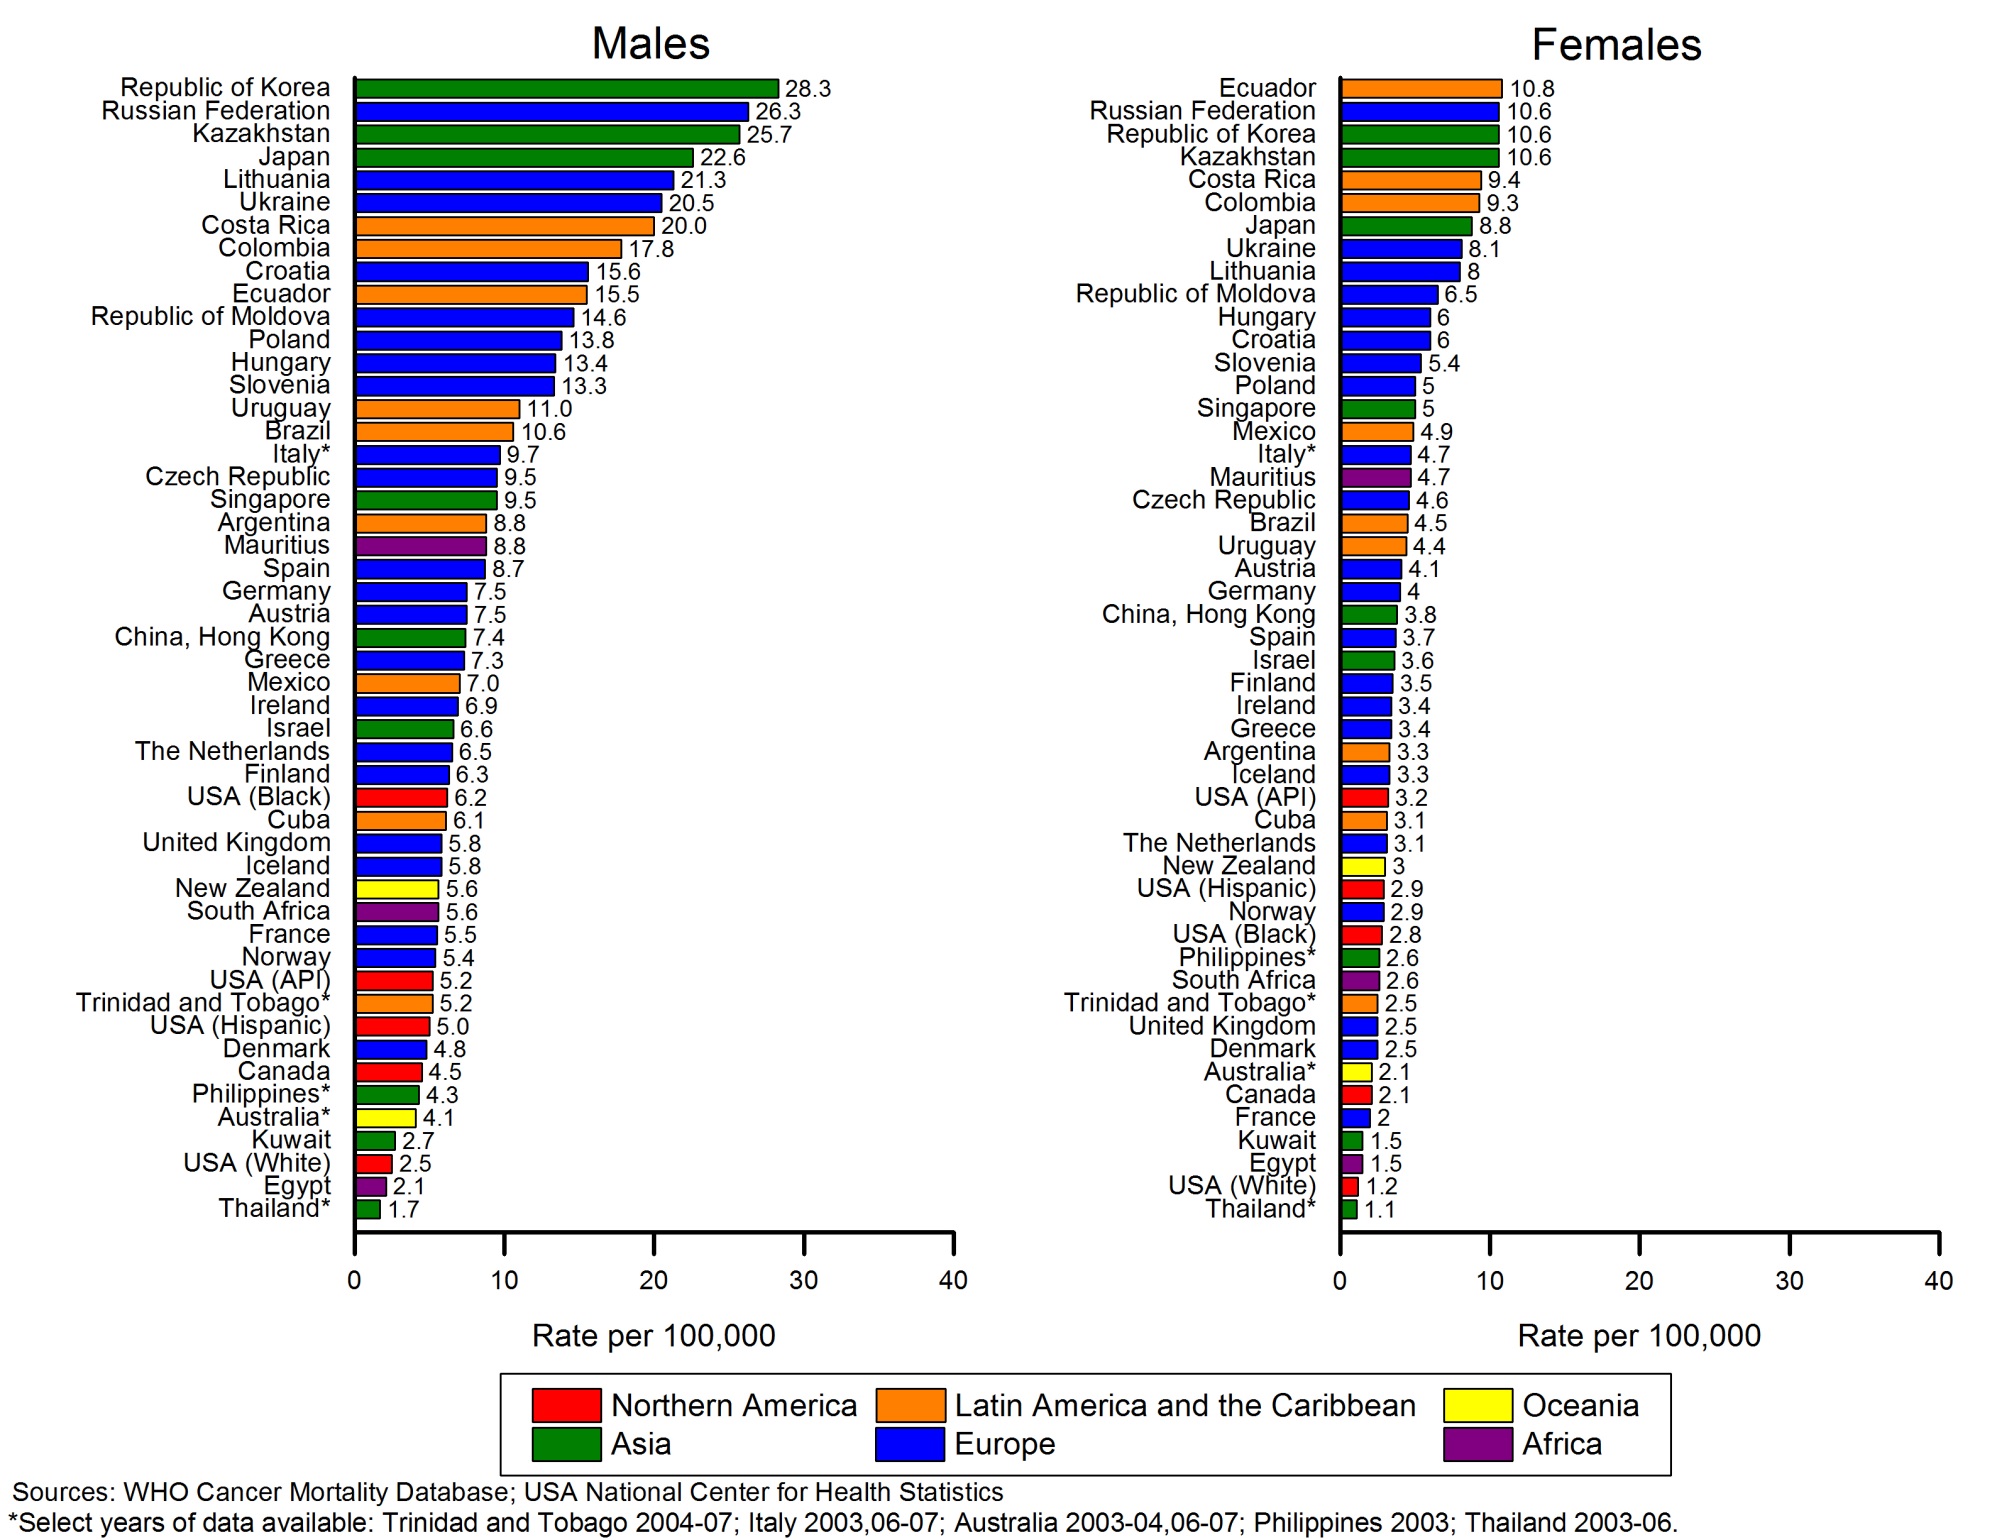
**

**Supplementary Figure S12. Stomach cancer mortality trends, males, select countries, 1950–2012**

**
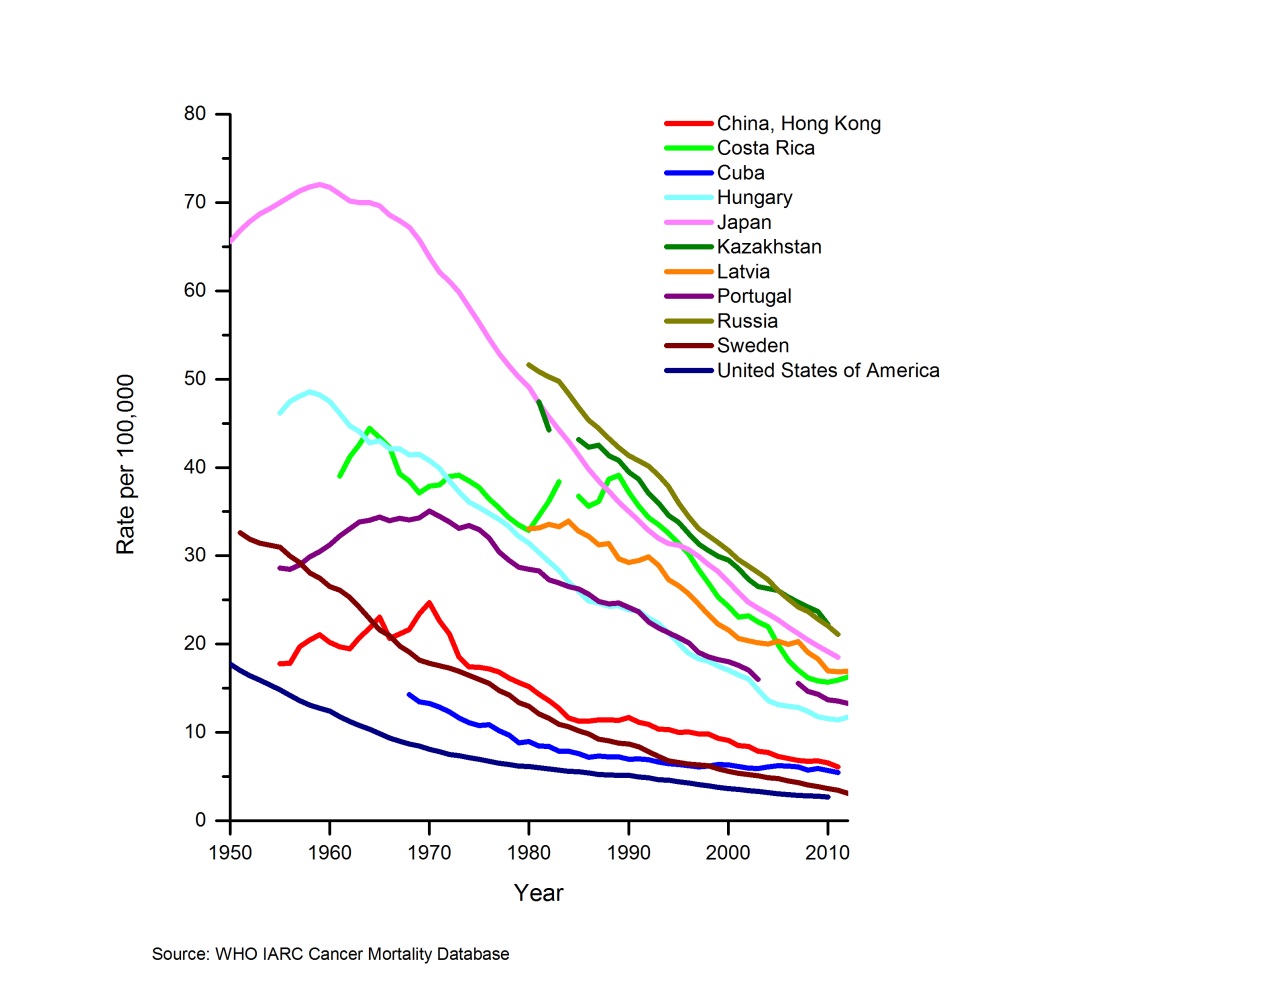
**

**Supplementary Figure S13. Liver cancer incidence rates by sex in select registries, 2003–2007**

**
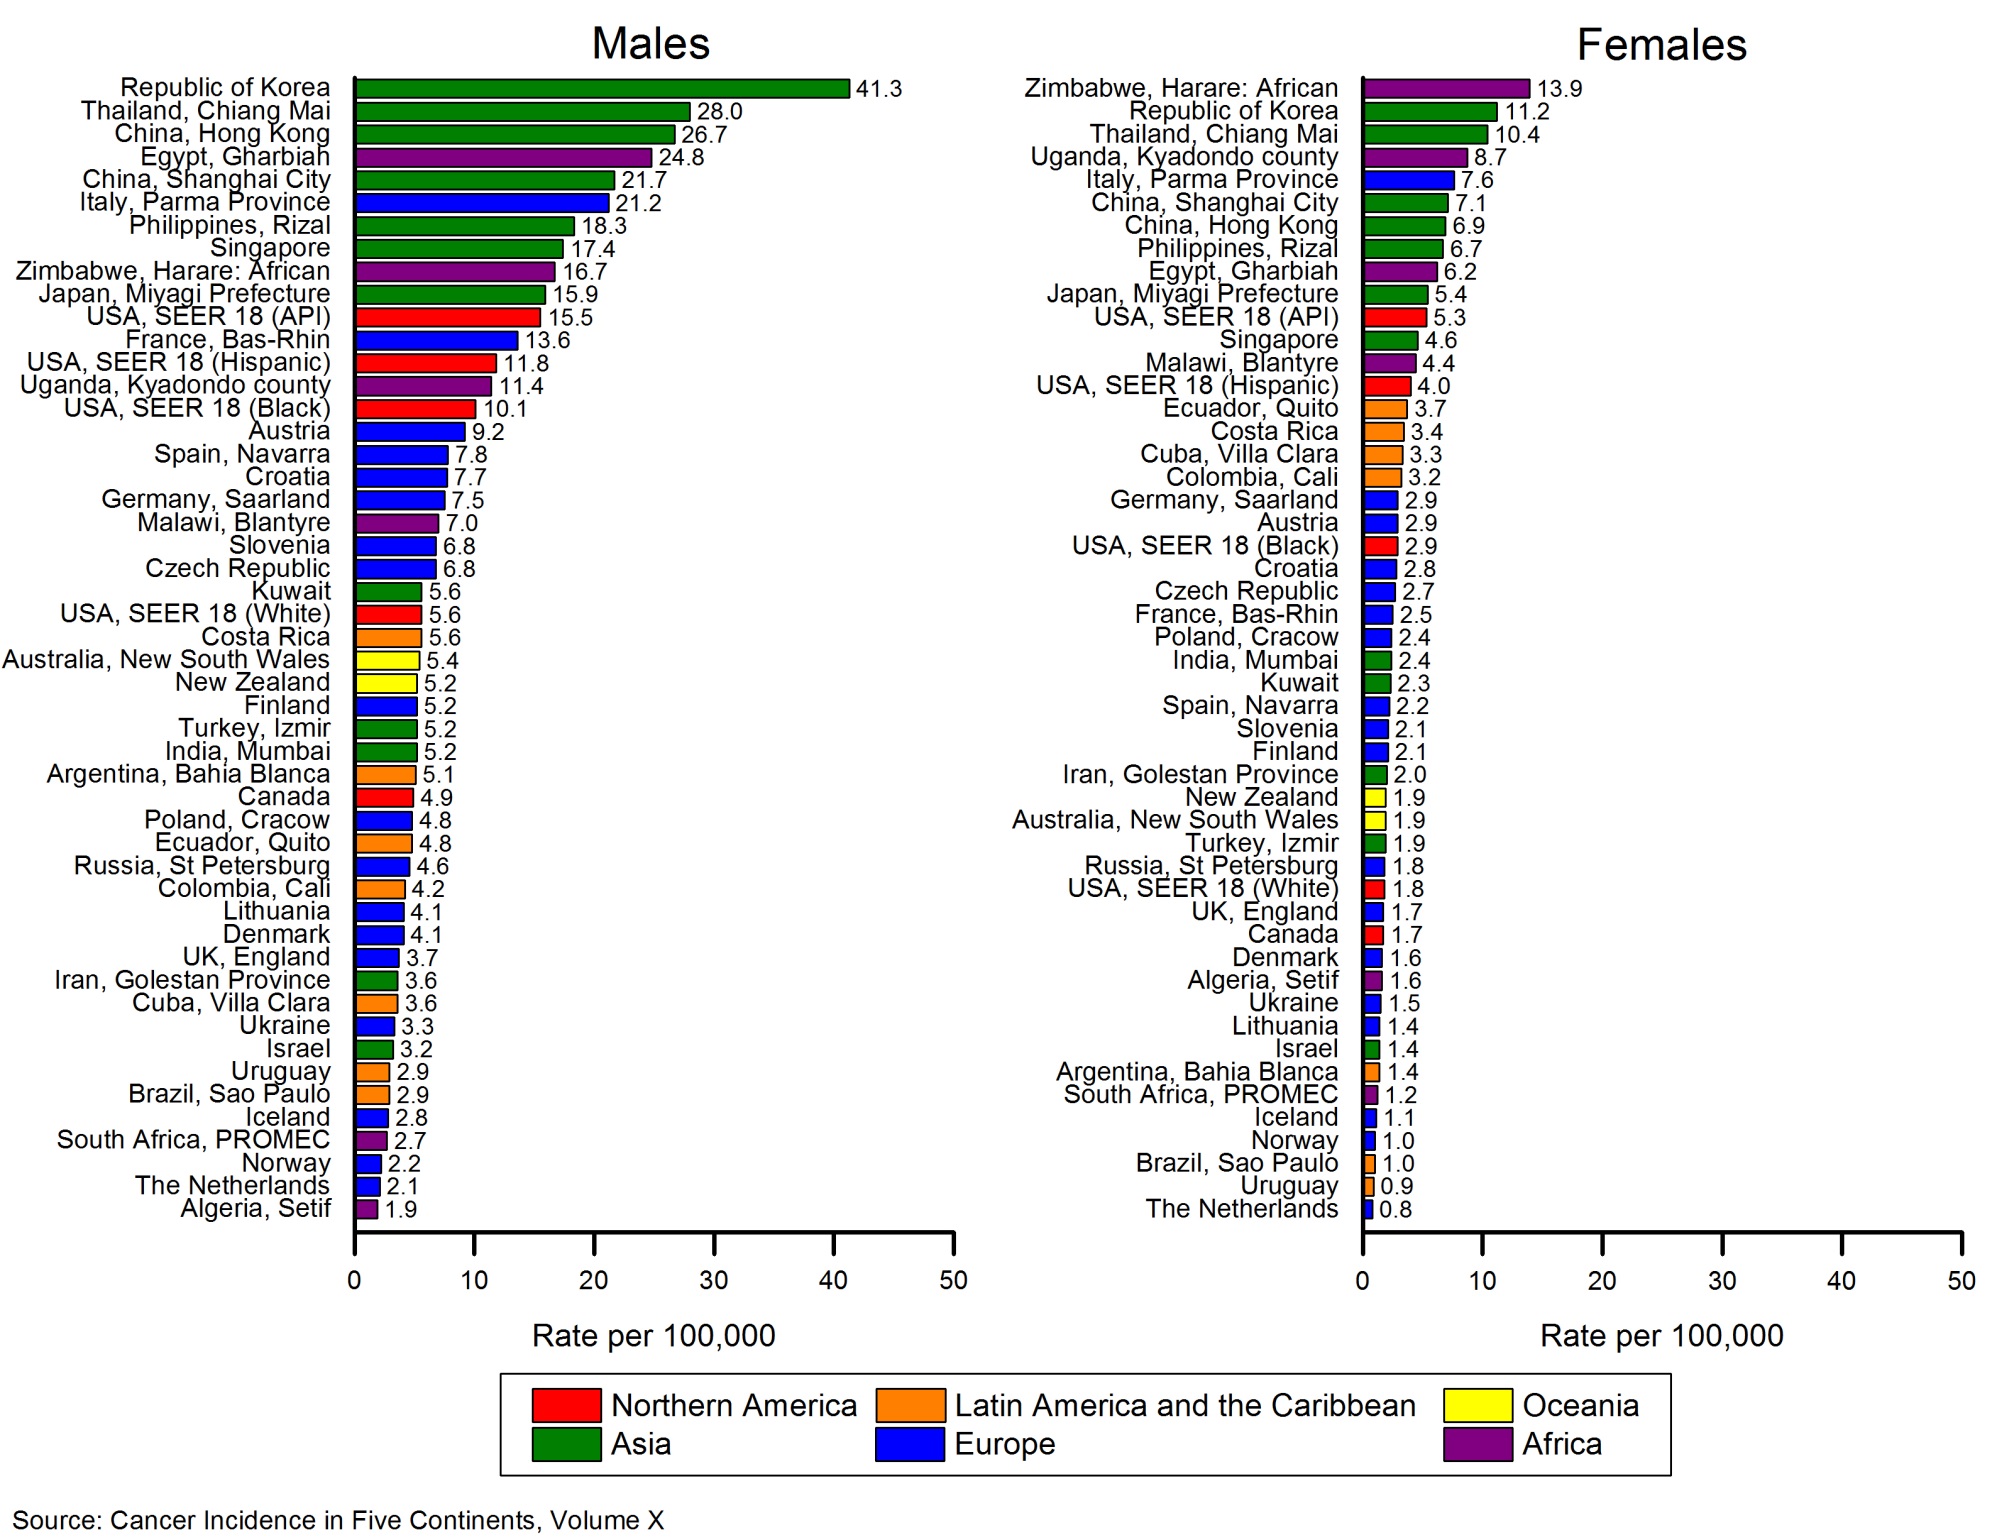
**

**Supplementary Figure S14. Liver cancer mortality rates by sex, select countries, 2003–2007**

**
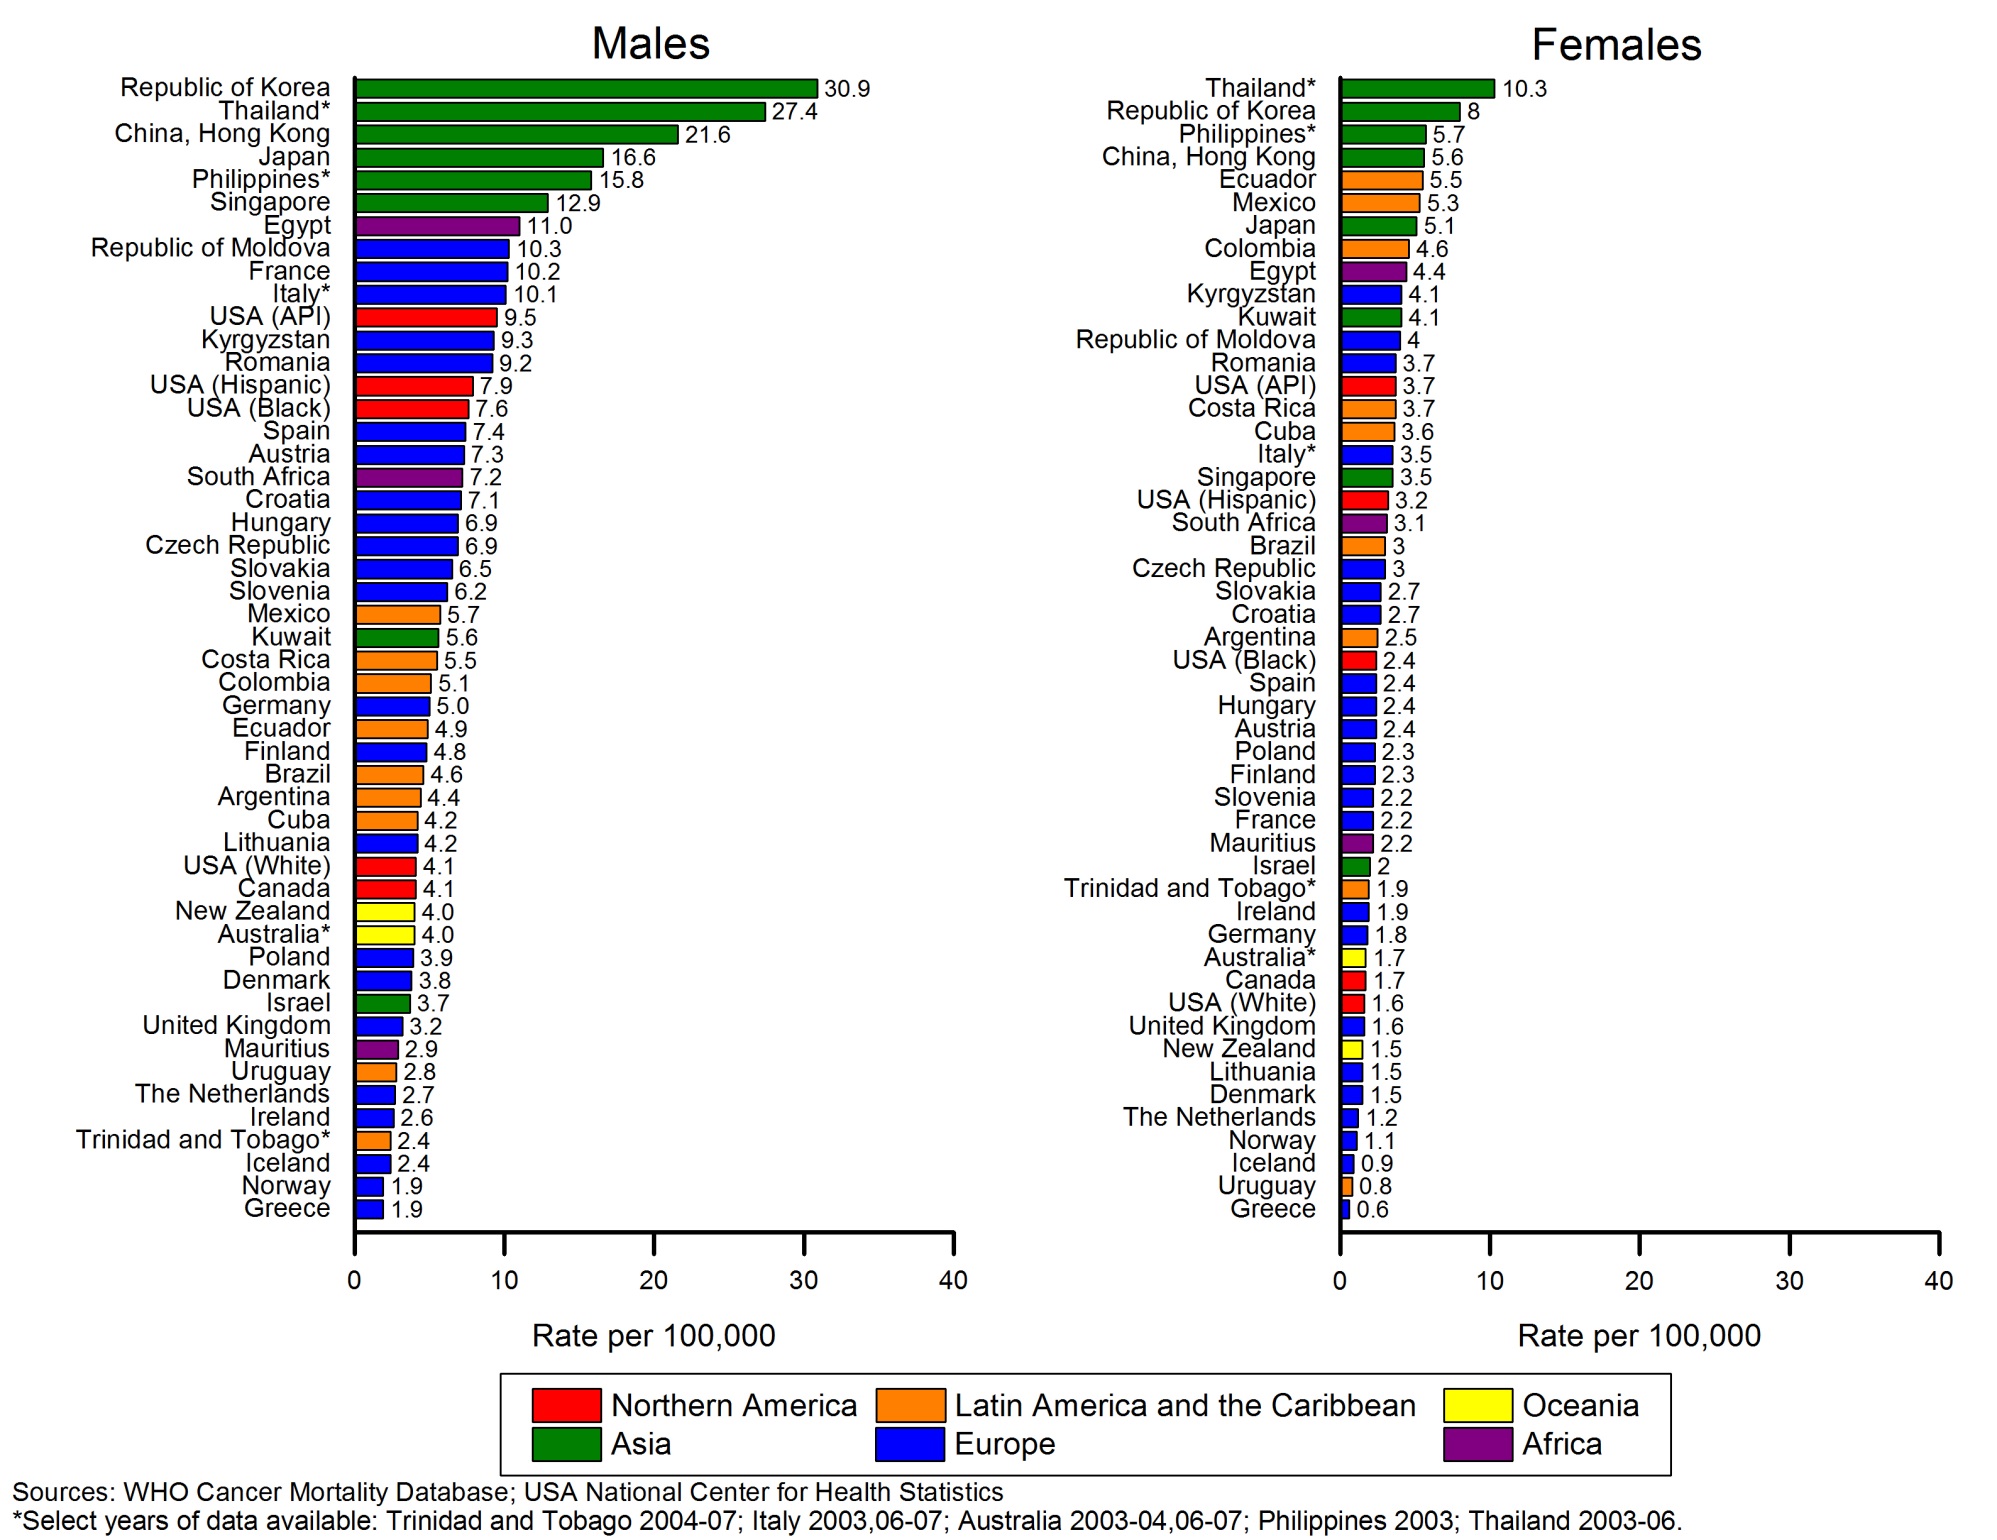
**

**Supplementary Figure S15. Esophageal cancer incidence rates by sex in select registries, 2003–2007**

**
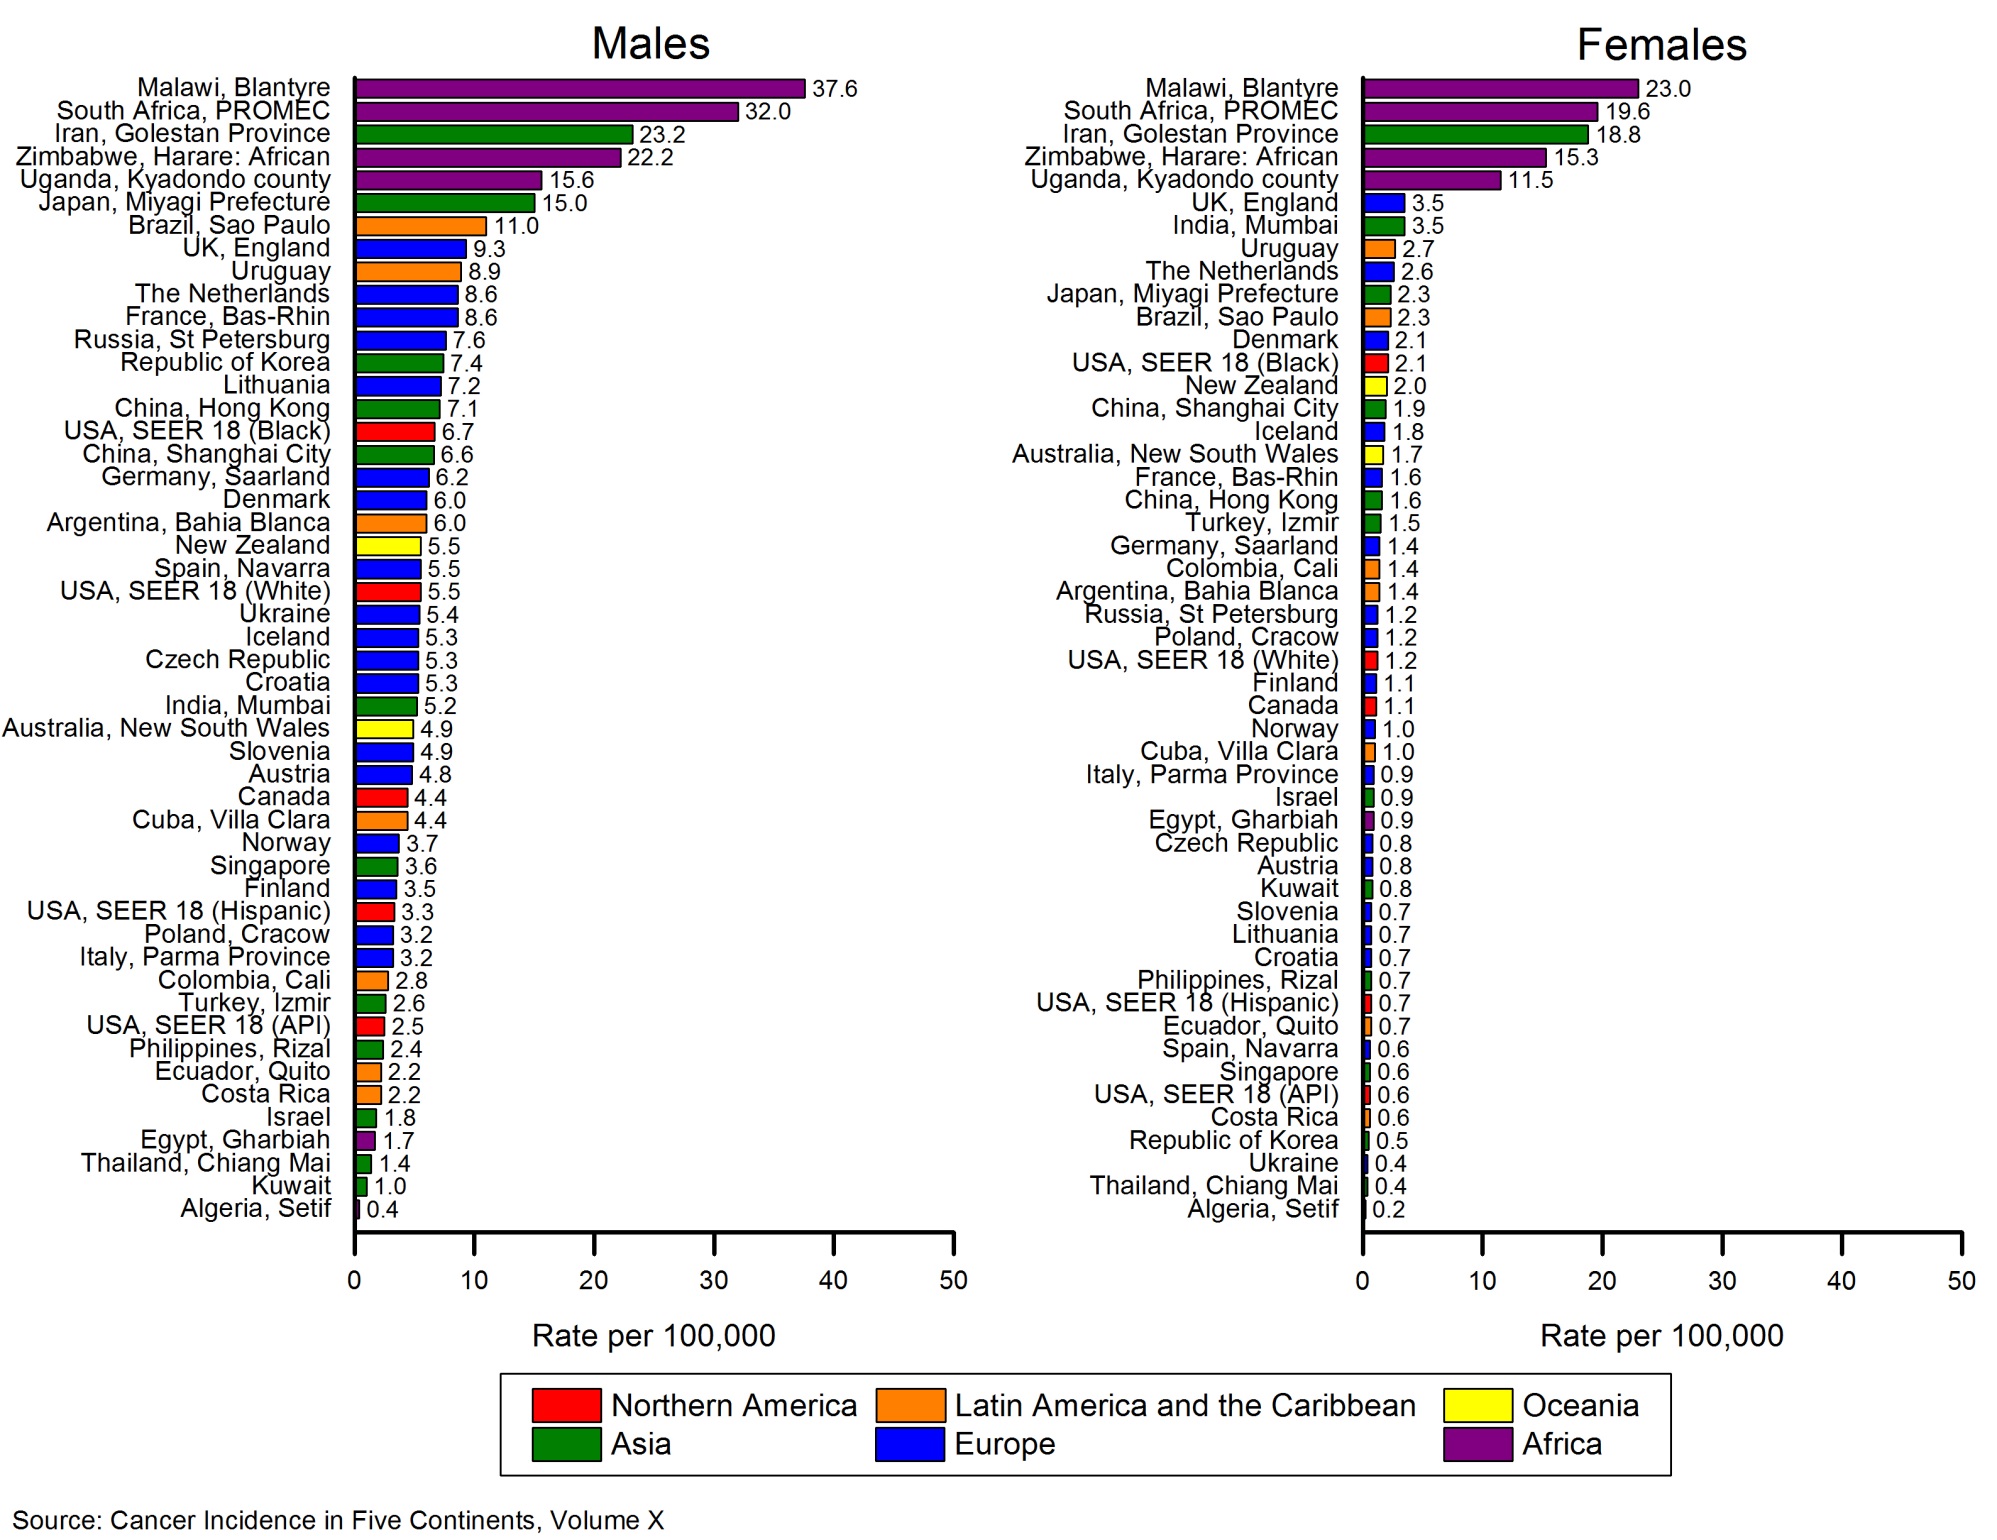
**

**Supplementary Figure S16. Esophageal cancer mortality rates by sex, select countries, 2003–2007**

**
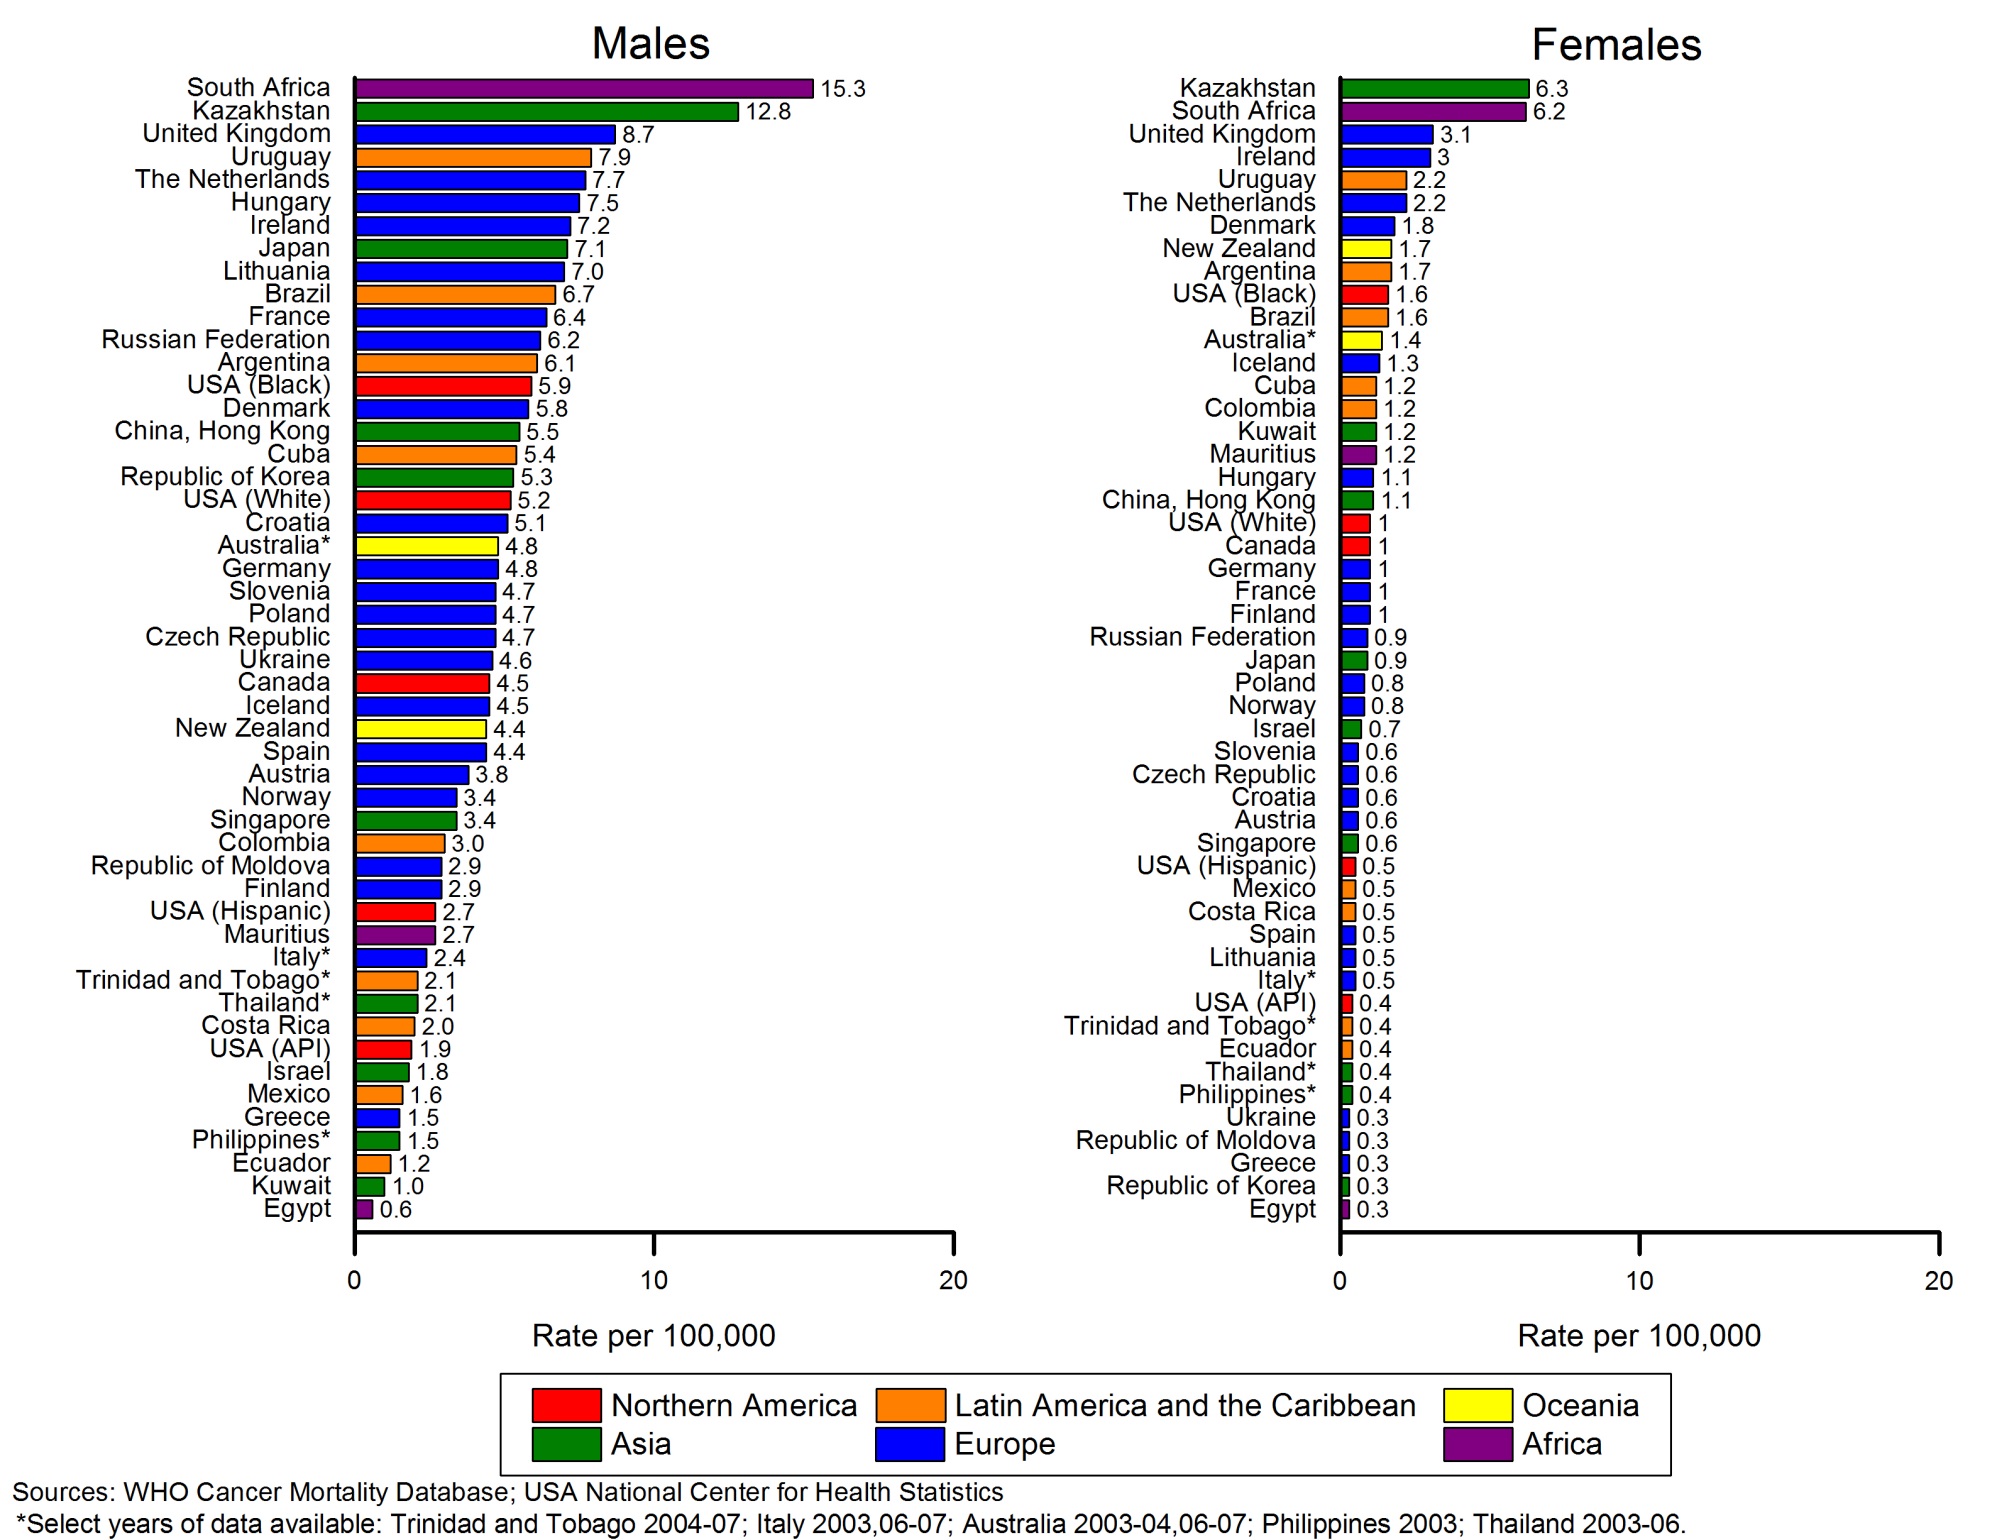
**

**Supplementary Figure S17. Cervical cancer incidence and mortality rates in select registries and countries, 2003–2007**

**
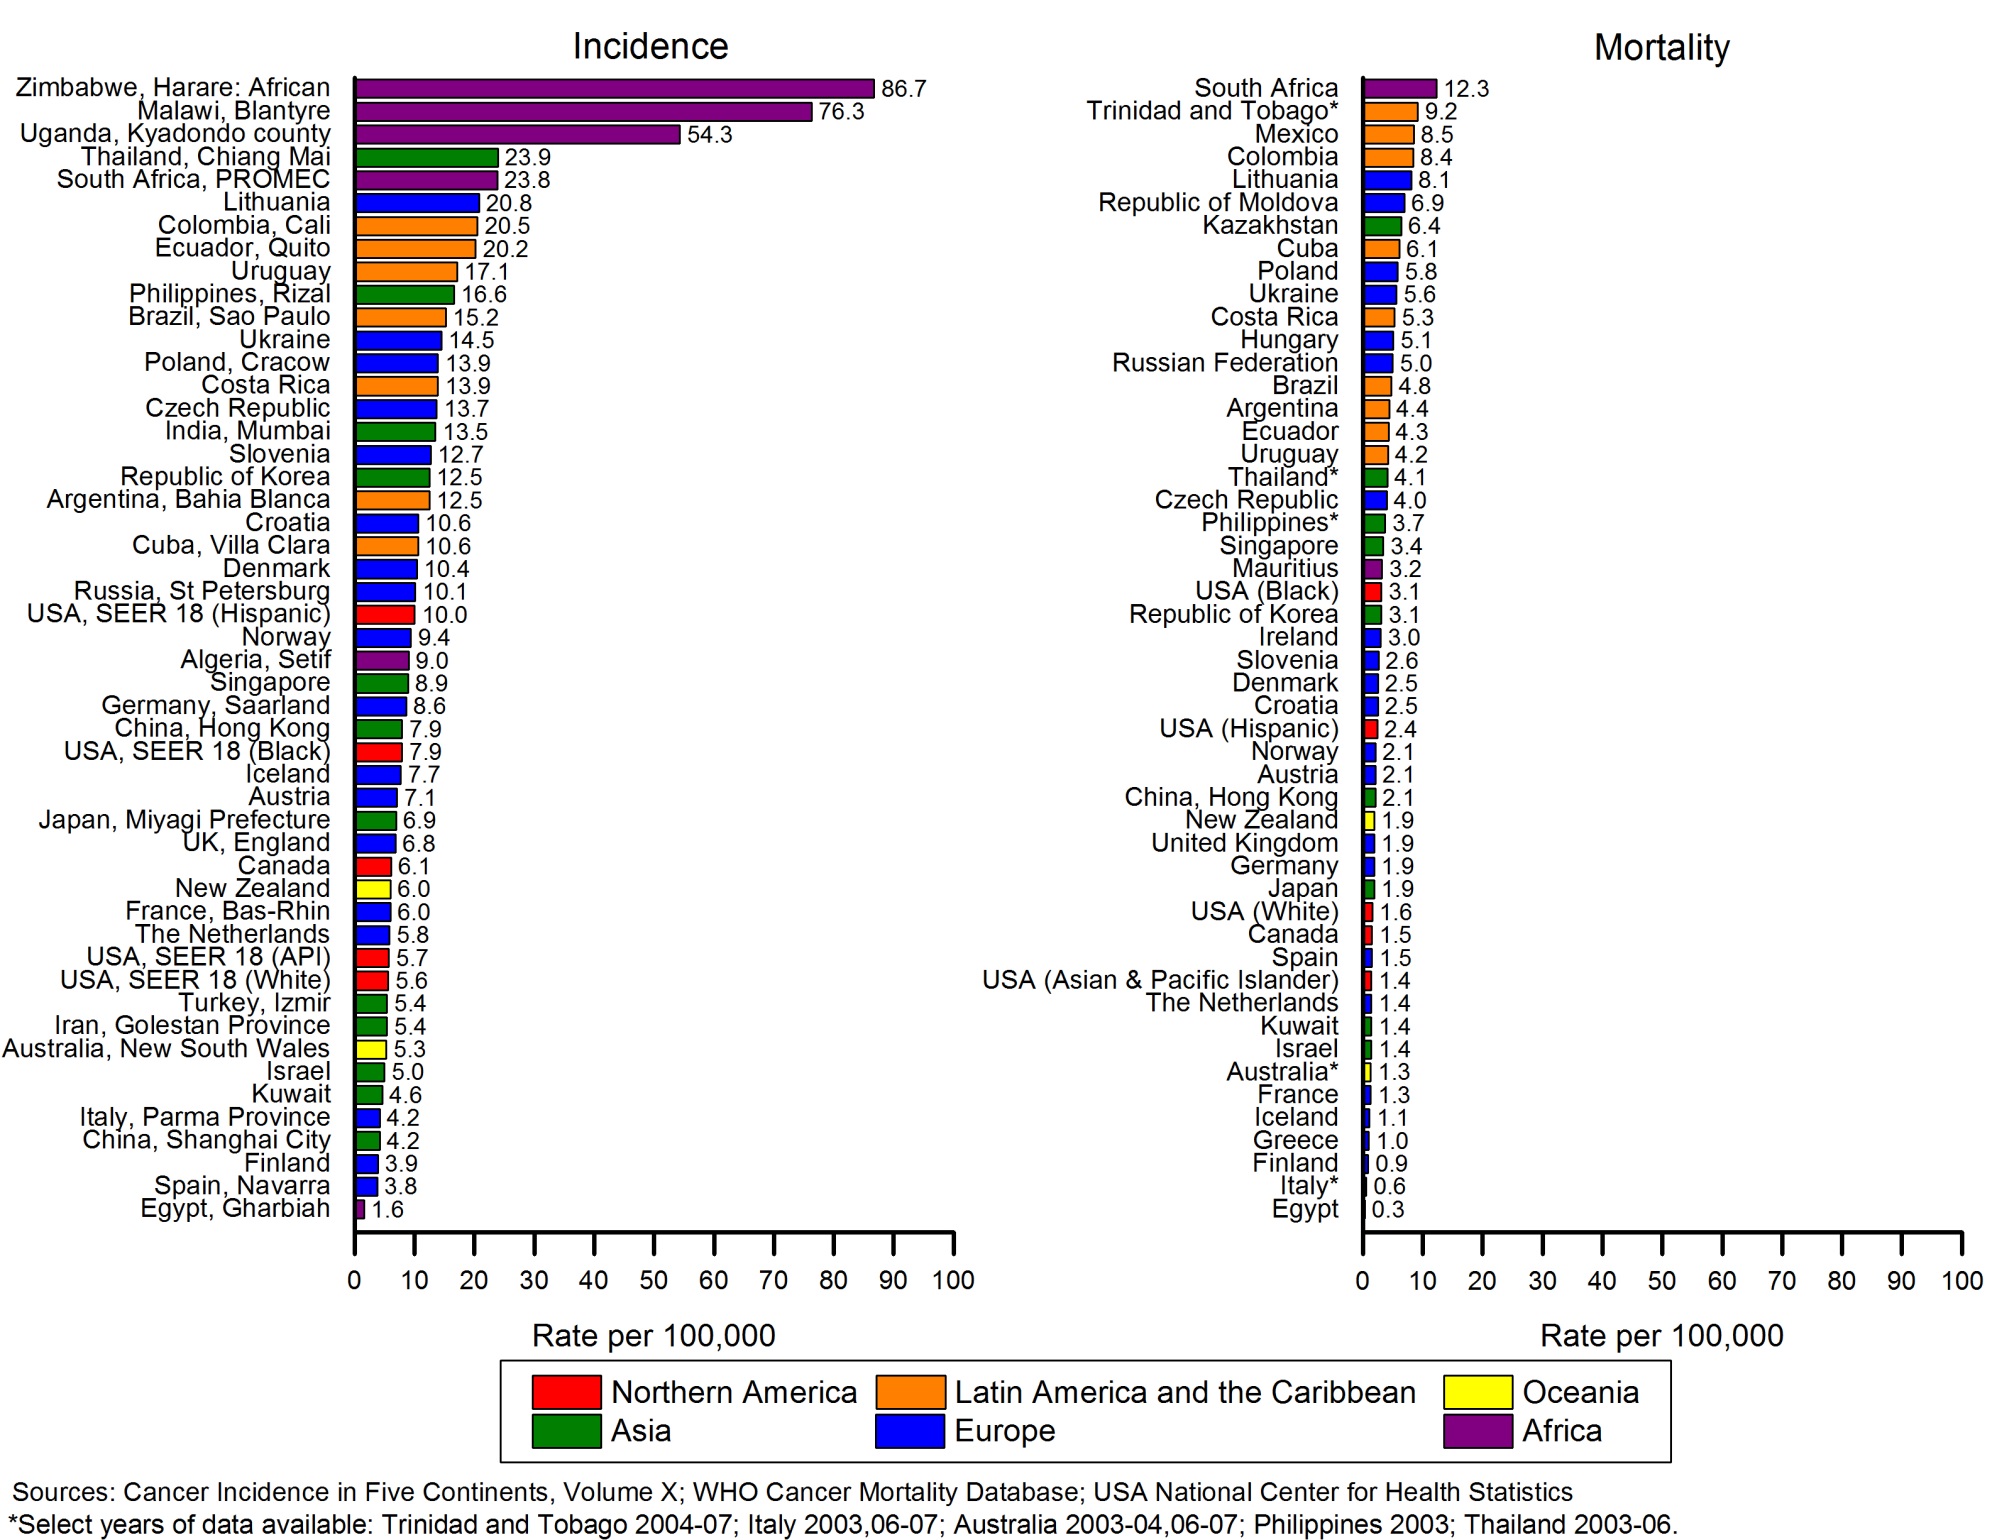
**
